# Supplementary material for: Twofold fused concave hosts containing two phosphorus atoms: modules for the sandwich-type encapsulation of fullerenes in variable cavities
Source: Royal Society of Chemistry journal article supplement (doi:10.1039/c5sc02224j), 2015-01-01
Supplement: c5sc02224j1.pdf [file c5sc02224j1.pdf]

Supporting Information

## **Twofold Fused Concave Hosts Containing Two Phosphorus Atoms: Modules for the Sandwich-type Encapsulation of Fullerenes in Variable Cavities**

**Masaki Yamamura,<sup>a\*</sup> Daigo Hongo,<sup>a</sup> Tatsuya Nabeshima<sup>a\*</sup>**

<sup>a</sup> *Graduate School of Pure and Applied Sciences, Tsukuba Research Center for Interdisciplinary Materials Science (TIMS), University of Tsukuba*

*1-1-1, Tennodai, Tsukuba, Ibaraki 305-8571, Japan*

E-mail: myama@chem.tsukuba.ac.jp

### **Table of contents**

|                                     |     |
|-------------------------------------|-----|
| (1) General methods                 | S2  |
| (2) Synthetic procedure             | S2  |
| (3) NMR spectra                     | S4  |
| (4) MALDI-TOF mass spectra          | S12 |
| (5) UV-vis spectra                  | S13 |
| (6) NMR spectral titration          | S14 |
| (7) UV-vis spectral titration       | S19 |
| (8) X-ray Crystallographic Analysis | S20 |
| (9) References                      | S27 |

## (1) General methods

All chemicals were reagent grade, and used without further purification. All reactions were performed under a nitrogen atmosphere. Chromatography was performed using SiO<sub>2</sub>-60N (0.063–0.212 mm; Kanto). Melting points were determined using a Yanaco and are uncorrected. The <sup>1</sup>H, <sup>13</sup>C, <sup>19</sup>F, and <sup>31</sup>P NMR spectra were recorded by Bruker AVANCE400 (400 MHz) or AVANCE600 (600 MHz) spectrometer at 298 K. Deuterated solvents were purchased from Cambridge Isotope Laboratories or Aldrich and used as received. Tetramethylsilane was used as the internal standard (0 ppm) for <sup>1</sup>H and <sup>13</sup>C NMR. Hexafluorobenzene was used as the external standard (–162 ppm) for <sup>19</sup>F NMR. Phosphorous acid was used as the external standard (0 ppm) for <sup>31</sup>P NMR. MALDI-TOF mass spectra were recorded by an AB Sciex TOF/TOF5800. UV-vis absorption spectra were recorded by JASCO Ubest V-670 at 298 K.

## (2) Synthetic procedure

### Synthesis of **1**

Compound **1** was prepared according to the synthetic procedure for similar derivatives.<sup>[S1]</sup> To sodium suspension (0.56 g, 24 mmol) in THF (60 mL) was added ethyl phosphite (2.0 mL, 15 mmol) and then the mixture was stirred at ambient temperature for 38 hours. This was added at 0 °C to an ether (30 mL) solution of 2-lithio-4-*tert*-butylanisole, which was prepared from 4-*tert*-butylanisole (5.5 g, 33 mmol), TMEDA (0.50 mL, 0.39 g, 3.4 mmol) and *n*-butyllithium/hexane (2.65 M, 13.5 mL, 35.8 mmol). The reaction mixture was stirred at ambient temperature for further 2 hours. This was quenched with 1 M HCl, and then most of solvent was evaporated. The residue was extracted with dichloromethane forth, and the combined organic phase was dried over MgSO<sub>4</sub>. Evaporation of the solvent gave the crude material. The crude material was washed with ether to give colorless powder of **1**. The filtrate was evaporated and purified by silica-gel column chromatography (eluent: CHCl<sub>3</sub>) to give colorless powder of **1** (total yield: 2.6 g, 6.9 mmol, 45 %).

**1**: colorless powder, mp. 158 °C; <sup>1</sup>H NMR (400 MHz, CDCl<sub>3</sub>) δ 1.30 (s, 18H), 3.70 (s, 6H), 6.80 (dd, <sup>3</sup>J = 8.5 Hz, J = 6.0 Hz, 2H), 7.48 (dd, <sup>3</sup>J = 8.5 Hz, J = 2.4 Hz, 2H), 7.73 (dd, J = 2.4 Hz, <sup>3</sup>J<sub>HP</sub> = 16.3 Hz, 2H), 8.21 (d, <sup>1</sup>J<sub>HP</sub> = 509.4 Hz, 1H); <sup>13</sup>C NMR (100MHz, CDCl<sub>3</sub>) δ 31.41 (CH<sub>3</sub>, s), 34.28 (C, s), 55.60 (CH<sub>3</sub>, s), 110.30 (CH, d, J = 6.6 Hz), 119.44 (C, d, J = 104.3 Hz), 130.20 (CH, d, J = 8.9 Hz), 130.40 (CH, d, J = 2.0 Hz), 143.34 (C, d, J = 11.7 Hz), 158.63 (C, d, J = 3.6 Hz); <sup>31</sup>P NMR (162 MHz, CDCl<sub>3</sub>) δ 11.97 (s); MALDI-TOF MS *m/z* 375.25 [M+H]<sup>+</sup>; Anal. Calcd. for C<sub>22</sub>H<sub>31</sub>O<sub>3</sub>P: C 70.57, H 8.34; found: C 70.12, H 8.47.

## Synthesis of 2

To a THF (50 mL) solution of **1** (1.50 g, 4.01 mmol) was added *n*-butyllithium/hexane (2.65 M, 1.5 mL, 4.0 mmol) at 0 °C and then the mixture was stirred at 0 °C for 2 hours. This was added to a THF (10 mL) solution of hexafluorobenzene (0.23 mL, 0.37 g, 2.0 mmol) at 0 °C and then the mixture was stirred at ambient temperature for 16 hours. This was quenched with water, and then most of THF was evaporated. The residue was extracted with dichloromethane forth, and the combined organic phase was dried over MgSO<sub>4</sub>. Evaporation of the solvent gave the crude material. The crude material was precipitated from ether/hexane to give colorless powder of **2** (0.461 g, 0.515 mmol, 26 %).

**2**: colorless powder, mp. >280 °C; <sup>1</sup>H NMR (600 MHz, CDCl<sub>3</sub>) δ 1.23 (s, 36H), 3.63 (s, 12H), 6.84 (dd, <sup>3</sup>J = 8.6 Hz, J = 6.2 Hz, 4H), 7.54 (dd, <sup>3</sup>J = 8.6 Hz, J = 2.4 Hz, 4H), 7.59 (dd, J = 2.4 Hz, <sup>3</sup>J<sub>HP</sub> = 16.2 Hz, 4H); <sup>13</sup>C NMR (150 MHz, CDCl<sub>3</sub>) δ 31.32 (CH<sub>3</sub>, s), 34.30 (C, s), 55.52 (CH<sub>3</sub>, s), 110.37 (CH, d, J = 7.2 Hz), 118.31 (C, d, J = 92.2 Hz), 118.78 (C, d, J = 115.1 Hz), 130.69 (CH, d, J = 9.5 Hz), 131.09 (CH, s), 143.41 (C, d, J = 12.3 Hz), 146.58 (C, dd, J = 253.2 Hz, J = 13.7 Hz), 159.18 (C, d, J = 2.2 Hz); <sup>31</sup>P NMR (243 MHz, CDCl<sub>3</sub>) δ 15.64 (s); <sup>19</sup>F NMR (565 MHz, CDCl<sub>3</sub>) δ -133.7 (s); MALDI-TOF MS *m/z* 895.43 [M+H]<sup>+</sup>; Anal. Calcd. for C<sub>50</sub>H<sub>60</sub>F<sub>4</sub>O<sub>6</sub>P<sub>2</sub>: C 67.10, H 6.76; found: C 66.93, H 6.80.

## Synthesis of 3

To a dichloromethane (20 mL) solution of **2** (359 mg, 401 μmol) was added boron tribromide (0.60 mL, 6.3 mmol) at ambient temperature and then the mixture was stirred for 8 hours. This was poured into ice/water. The mixture was extracted with dichloromethane, and the combined organic phase was dried over MgSO<sub>4</sub>. Evaporation of the solvent gave the crude material. The crude material was washed with ether to give colorless powder of **3** (304 mg, 363 μmol, 91%).

**3**: colorless powder, mp. >280 °C; <sup>1</sup>H NMR (400 MHz, acetone-*d*<sub>6</sub>) δ 1.24 (s, 36H), 6.95 (dd, <sup>3</sup>J = 8.7 Hz, J = 6.3 Hz, 4H), 7.60 (dd, <sup>3</sup>J = 8.7 Hz, J = 2.0 Hz, 4H), 7.77 (dd, J = 2.0 Hz, <sup>3</sup>J<sub>HP</sub> = 16.3 Hz, 4H), 10.32 (s, 2H); <sup>13</sup>C NMR (100 MHz, acetone-*d*<sub>6</sub>) δ 30.70 (CH<sub>3</sub>, s), 33.93 (C, s), 113.71 (C, d, J = 113.0 Hz), 116.76 (CH, d, J = 8.8 Hz), 116.85 (CH, d, J = 8.7 Hz), 127.93 (CH, d, J = 10.6 Hz), 132.45 (CH, d, J = 2.2 Hz), 142.38 (C, d, J = 12.4 Hz), 146.63 (C, d, J = 237.2 Hz), 158.68 (C, d, J = 4.2 Hz), 158.82 (C, d, J = 3.6 Hz); <sup>31</sup>P NMR (162 MHz, acetone-*d*<sub>6</sub>) δ 27.0 (s); <sup>19</sup>F NMR (376 MHz, acetone-*d*<sub>6</sub>) δ -133.8 (s); MALDI-TOF MS *m/z* 839.41 [M+H]<sup>+</sup>; Anal. Calcd. for C<sub>46</sub>H<sub>52</sub>F<sub>4</sub>O<sub>6</sub>P<sub>2</sub>·H<sub>2</sub>O: C 64.48, H 6.35; found: C 64.17, H 6.18.

## Synthesis of P2

To a DMF (80 mL) solution of **3** (136 mg, 162  $\mu\text{mol}$ ) was added *t*-BuOK (90.0 mg, 0.80 mmol) at ambient temperature and then the mixture was stirred at 80 °C for 44 hours. To the reaction mixture was added 1 M HCl at 0 °C. The mixture was extracted with dichloromethane, and the combined organic phase was dried over MgSO<sub>4</sub>. Evaporation of the solvent gave the crude material. The crude material was separated by silica-gel column chromatography to give colorless powder of **P2** (93.7 mg, 123  $\mu\text{mol}$ , 76%) and **P2'** (18.2 mg, 24.0  $\mu\text{mol}$ , 15%).

**P2**: colorless solid, mp. > 280°C; <sup>1</sup>H NMR (400 MHz, CDCl<sub>3</sub>)  $\delta$  1.42 (s, 36H), 7.54 (dd, <sup>3</sup>*J* = 8.9 Hz, *J* = 6.4 Hz, 4H), 7.71 (dd, <sup>3</sup>*J* = 8.9 Hz, *J* = 2.4 Hz, 4H), 8.23 (dd, <sup>3</sup>*J*<sub>HP</sub> = 12.7 Hz, *J* = 2.4 Hz, 4H); <sup>13</sup>C NMR (100 MHz, CDCl<sub>3</sub>)  $\delta$  31.3 (CH<sub>3</sub>, s), 34.8 (C, s), 109.1 (C, d, *J* = 91.3 Hz), 116.0 (C, d, *J* = 115.9 Hz), 119.8 (CH, d, *J* = 6.4 Hz), 125.6 (CH, d, *J* = 5.5 Hz), 131.6 (CH, s), 139.4 (C, d, *J* = 9.3 Hz), 147.9 (C, d, *J* = 9.9 Hz), 155.5 (C, d, *J* = 2.2 Hz). <sup>31</sup>P NMR (162MHz, CDCl<sub>3</sub>)  $\delta$  -27.9 (s). MALDI-TOF MS *m/z* 758.34 [M+H]<sup>+</sup>; Anal. Calcd. for C<sub>46</sub>H<sub>48</sub>O<sub>6</sub>P<sub>2</sub>·H<sub>2</sub>O: C 71.12, H 6.49; found: C 71.07, H 6.29.

**P2'**: colorless solid, mp. > 280°C; <sup>1</sup>H NMR (400MHz, CDCl<sub>3</sub>)  $\delta$  1.45 (s, 36H), 7.60 (dd, <sup>3</sup>*J* = 8.9 Hz, *J* = 6.4 Hz, 4H), 7.75 (dd, <sup>3</sup>*J* = 8.9 Hz, *J* = 2.3 Hz, 4H), 8.26 (dd, <sup>3</sup>*J*<sub>HP</sub> = 12.9 Hz, *J* = 2.3 Hz, 4H). <sup>31</sup>P NMR (162MHz, CDCl<sub>3</sub>)  $\delta$  -27.5 (s). <sup>13</sup>C NMR (100MHz, CDCl<sub>3</sub>)  $\delta$  31.3 (CH<sub>3</sub>, s), 34.8 (C, s), 108.7 (C, d, *J* = 90.6 Hz), 116.3 (C, d, *J* = 116.7 Hz), 120.0 (CH, d, *J* = 6.4 Hz), 125.4 (CH, d, *J* = 5.5 Hz), 131.7 (CH, s), 138.4 (C, d, *J* = 8.8 Hz), 148.0 (C, d, *J* = 10.0 Hz), 155.3 (C, d, *J* = 1.5 Hz). MALDI-TOF MS *m/z* 758.34 [M+H]<sup>+</sup>; Anal. Calcd. for C<sub>46</sub>H<sub>48</sub>O<sub>6</sub>P<sub>2</sub>·1.5H<sub>2</sub>O: C 70.31, H 6.54; found: C 70.22, H 6.46.

### (3) NMR spectra

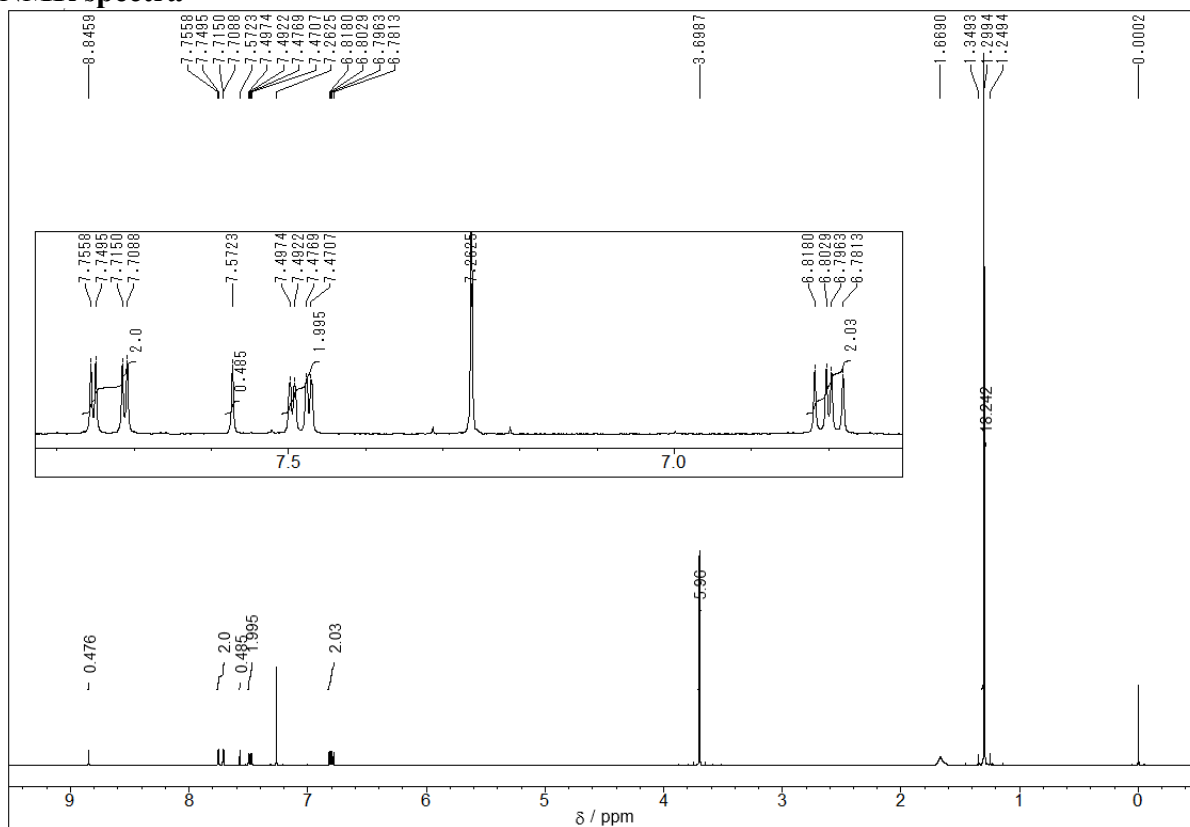

**Figure S1.**  $^1\text{H}$  NMR spectrum of **1** (400 MHz,  $\text{CDCl}_3$ ).

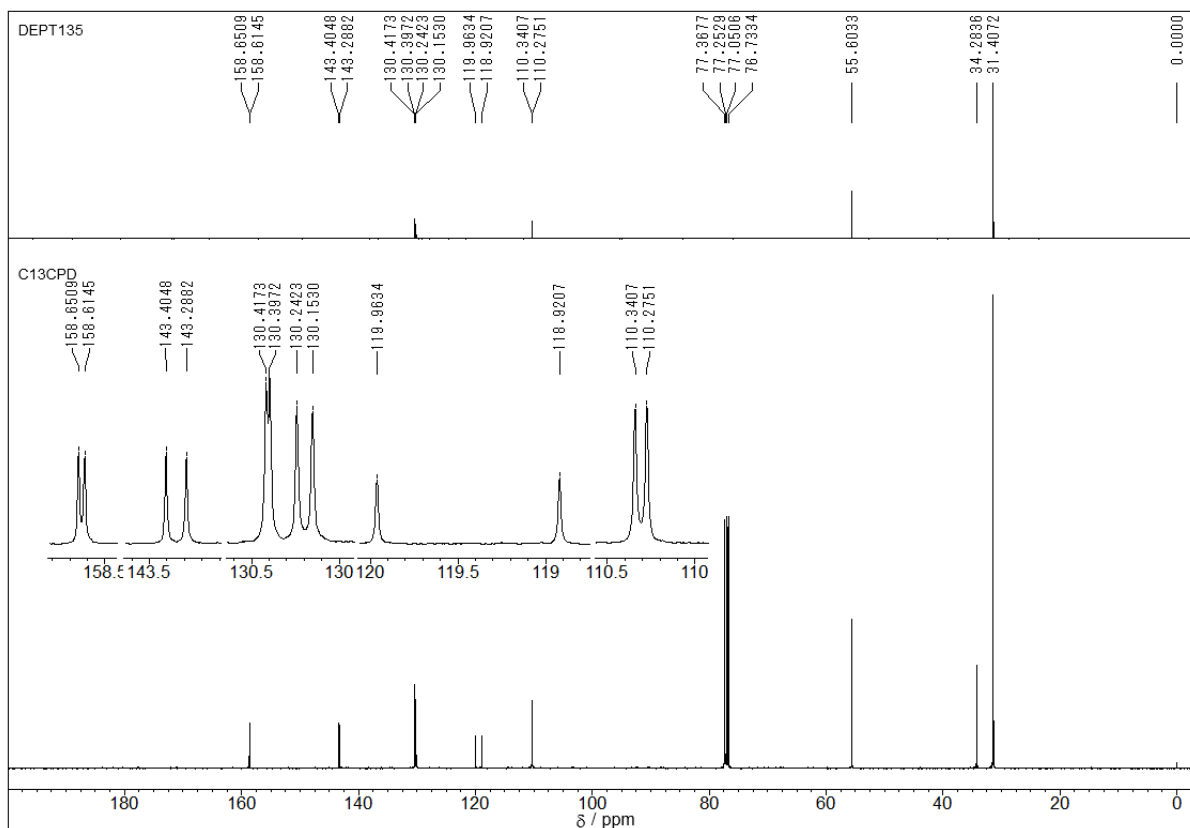

**Figure S2.**  $^{13}\text{C}$  NMR spectrum of **1** (100 MHz,  $\text{CDCl}_3$ ).

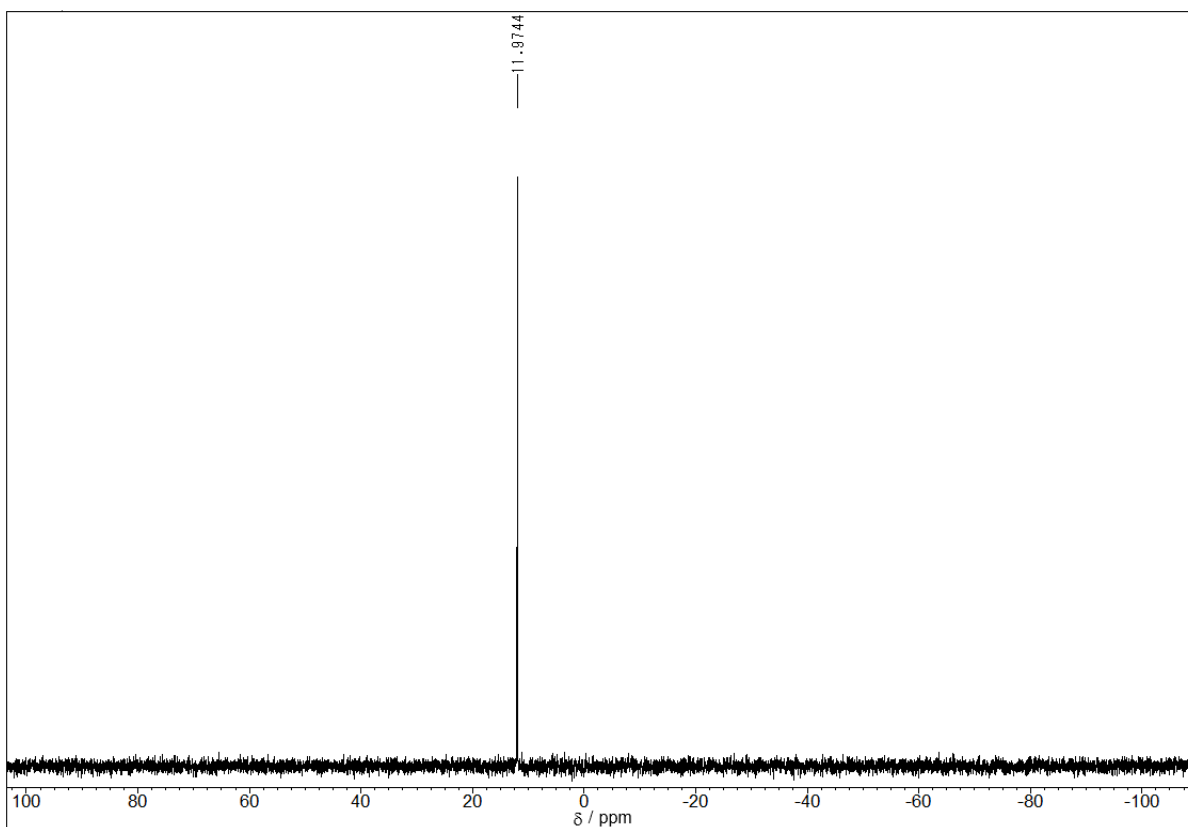

Figure S3.  $^{31}\text{P}$  NMR spectrum of **1** (162 MHz,  $\text{CDCl}_3$ ).

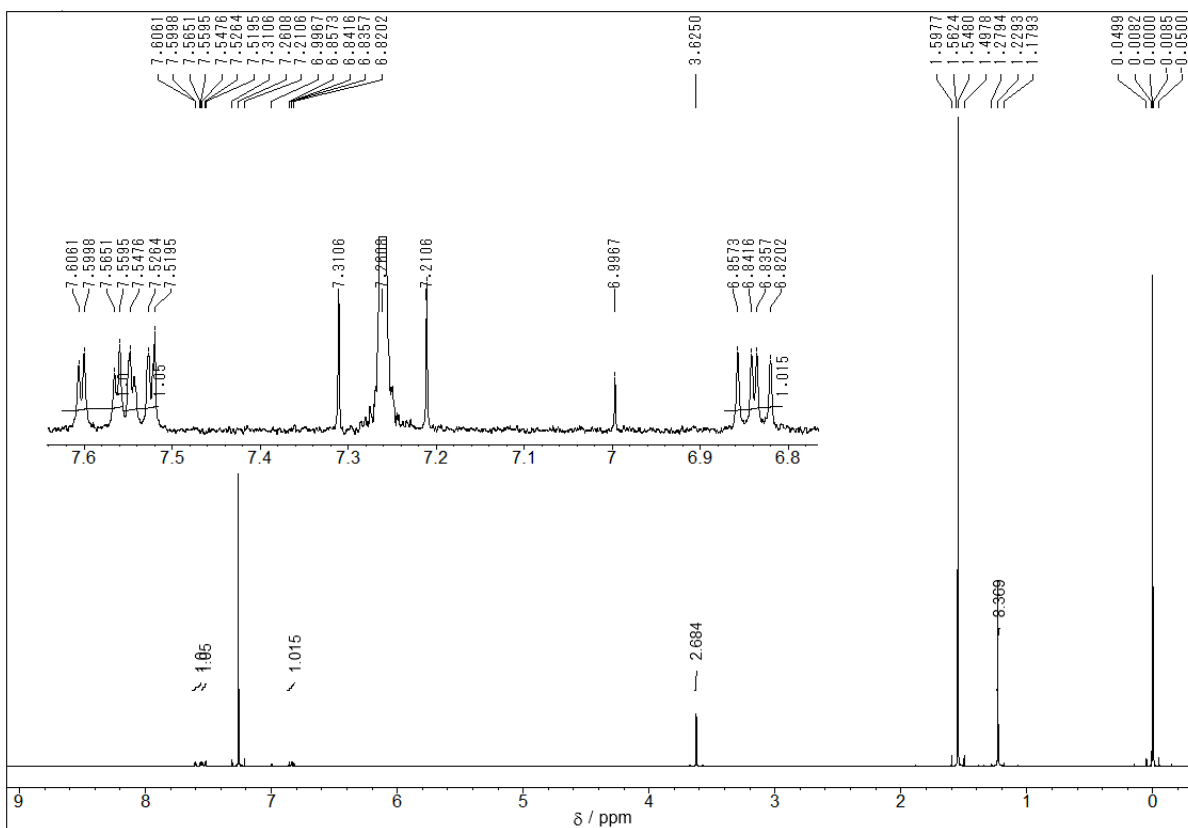

Figure S4.  $^1\text{H}$  NMR spectrum of **2** (600 MHz,  $\text{CDCl}_3$ ).

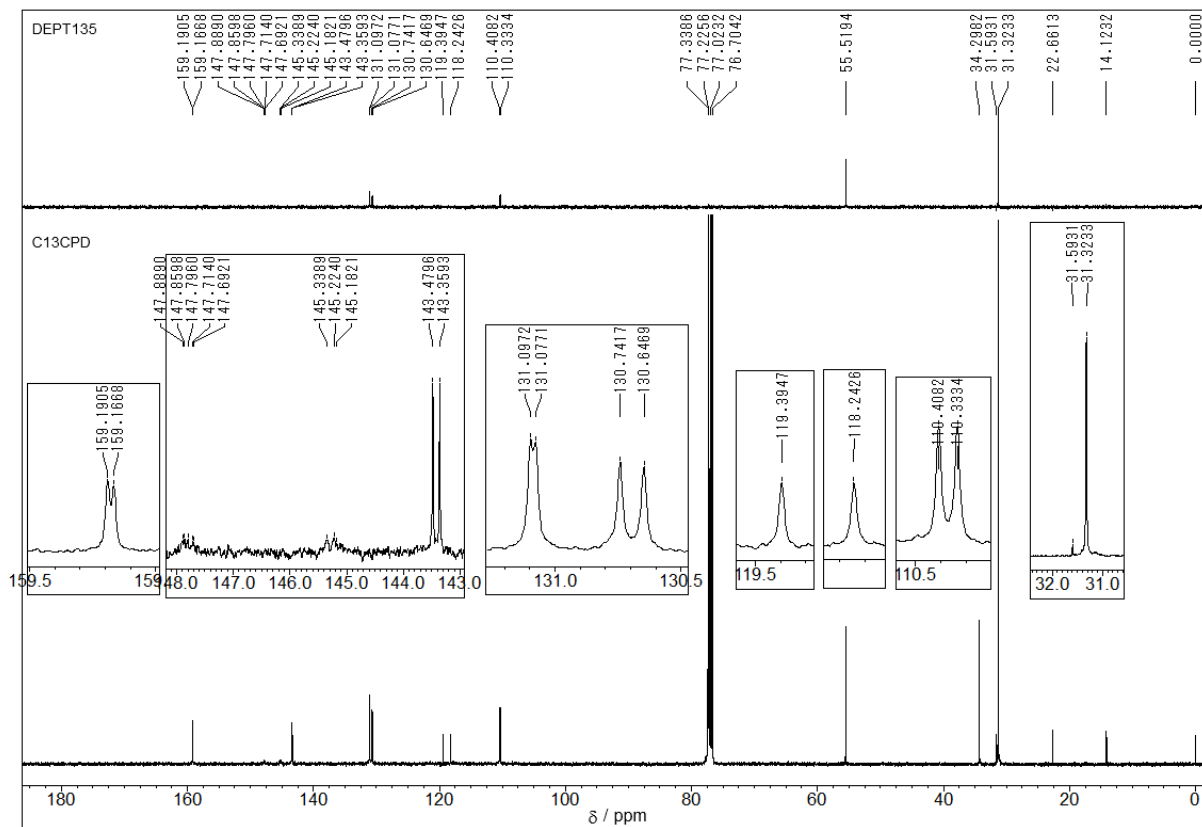

Figure S5.  $^{13}\text{C}$  NMR spectrum of **2** (150 MHz,  $\text{CDCl}_3$ ).

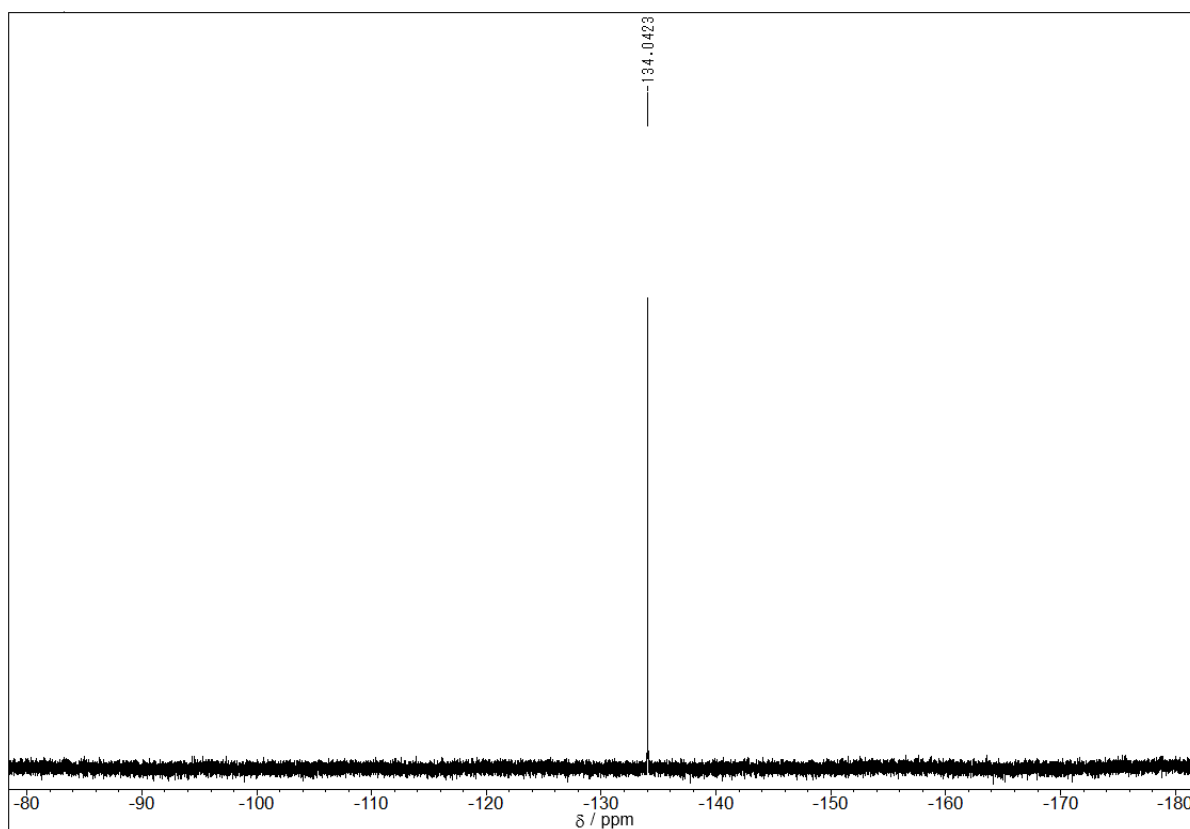

Figure S6.  $^{19}\text{F}$  NMR spectrum of **2** (565 MHz,  $\text{CDCl}_3$ ).

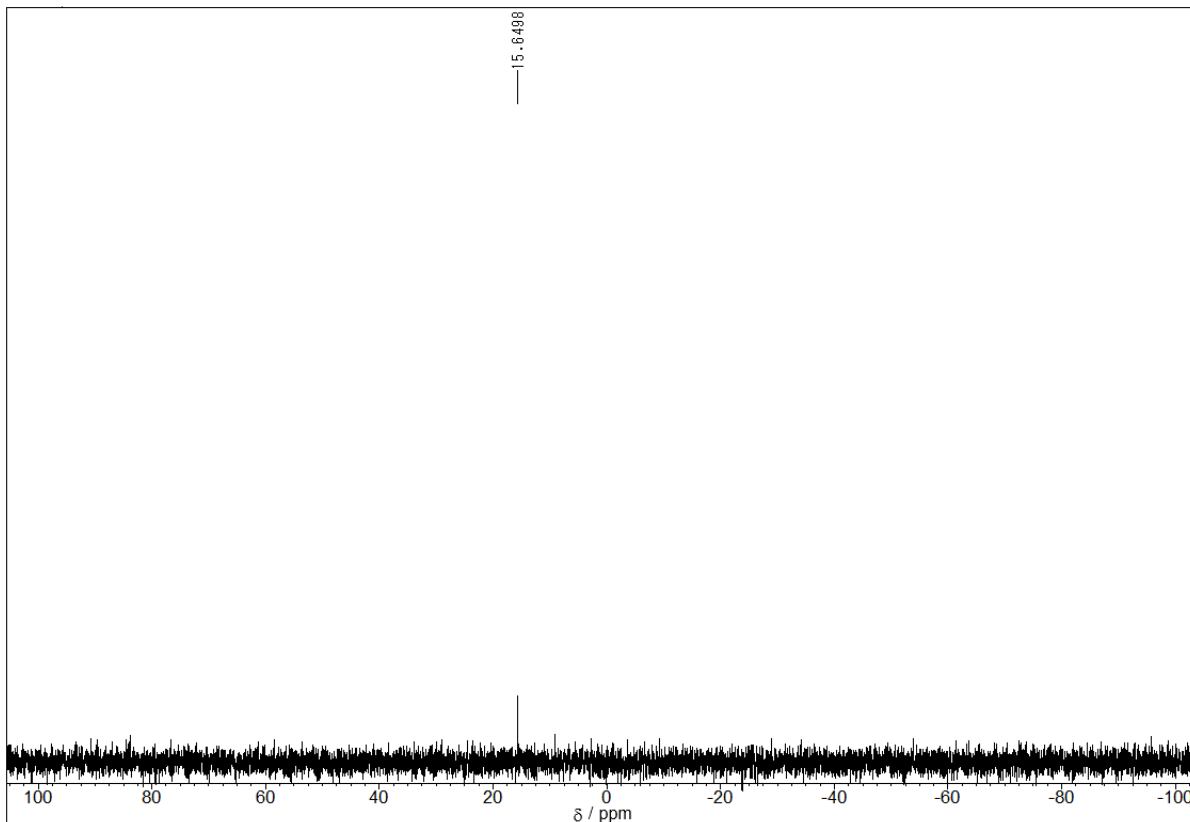

Figure S7.  $^{31}\text{P}$  NMR spectrum of **2** (243 MHz,  $\text{CDCl}_3$ ).

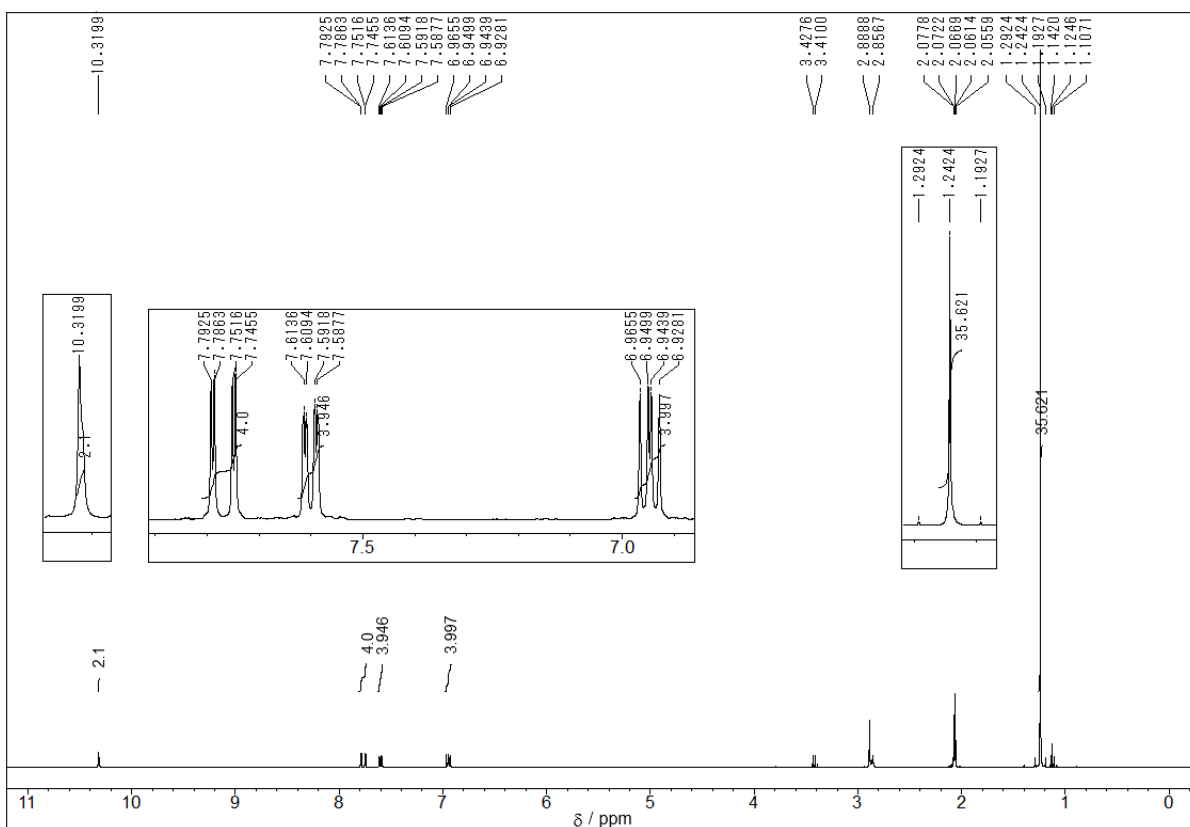

Figure S8.  $^1\text{H}$  NMR spectrum of **3** (400 MHz,  $\text{acetone-}d_6$ ).



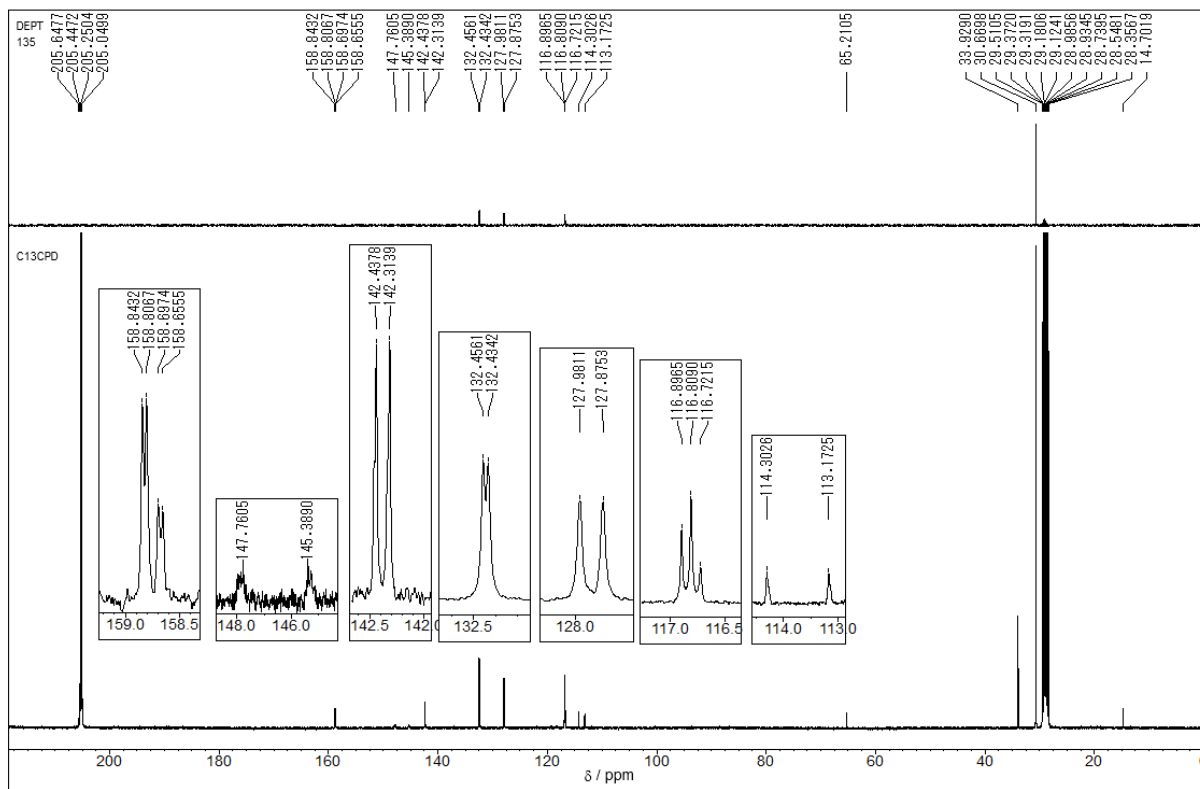

Figure S9.  $^{13}\text{C}$  NMR spectrum of **3** (100 MHz, acetone- $d_6$ ).

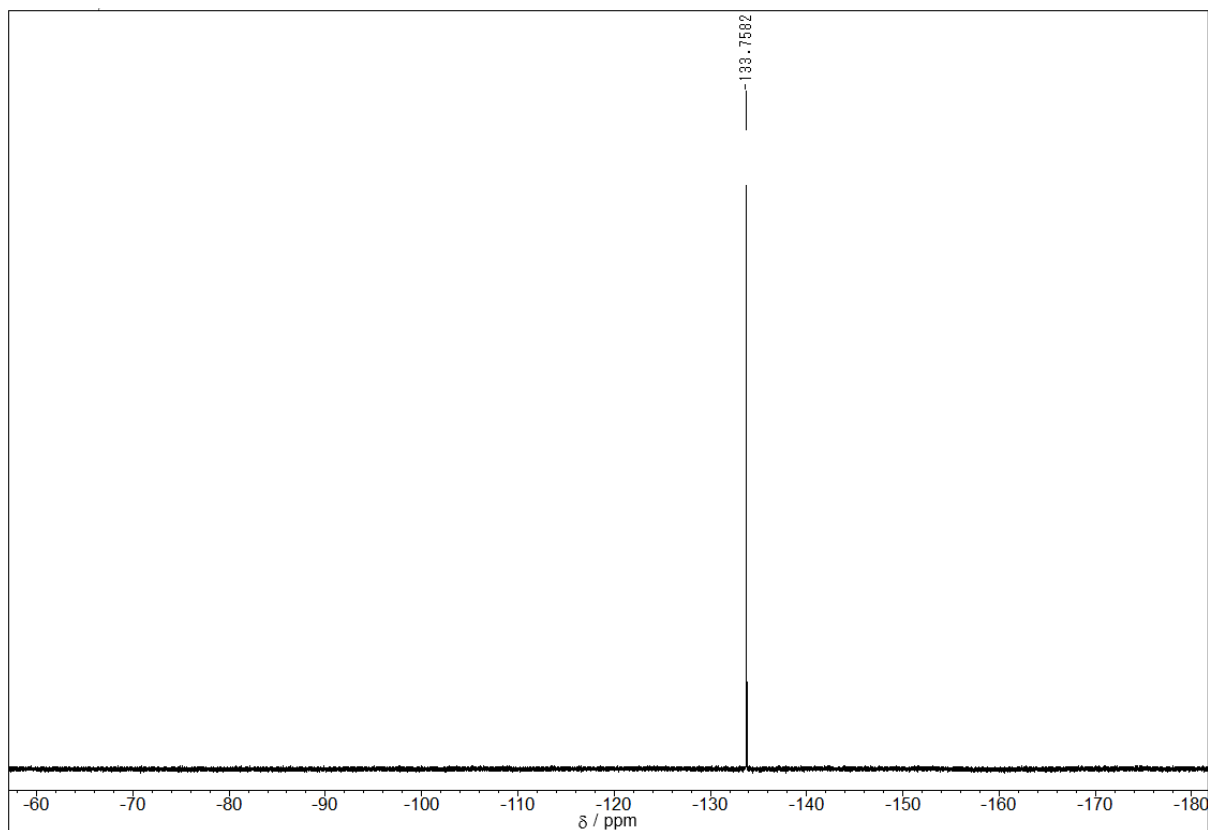

Figure S10.  $^{19}\text{F}$  NMR spectrum of **3** (376 MHz, acetone- $d_6$ ).

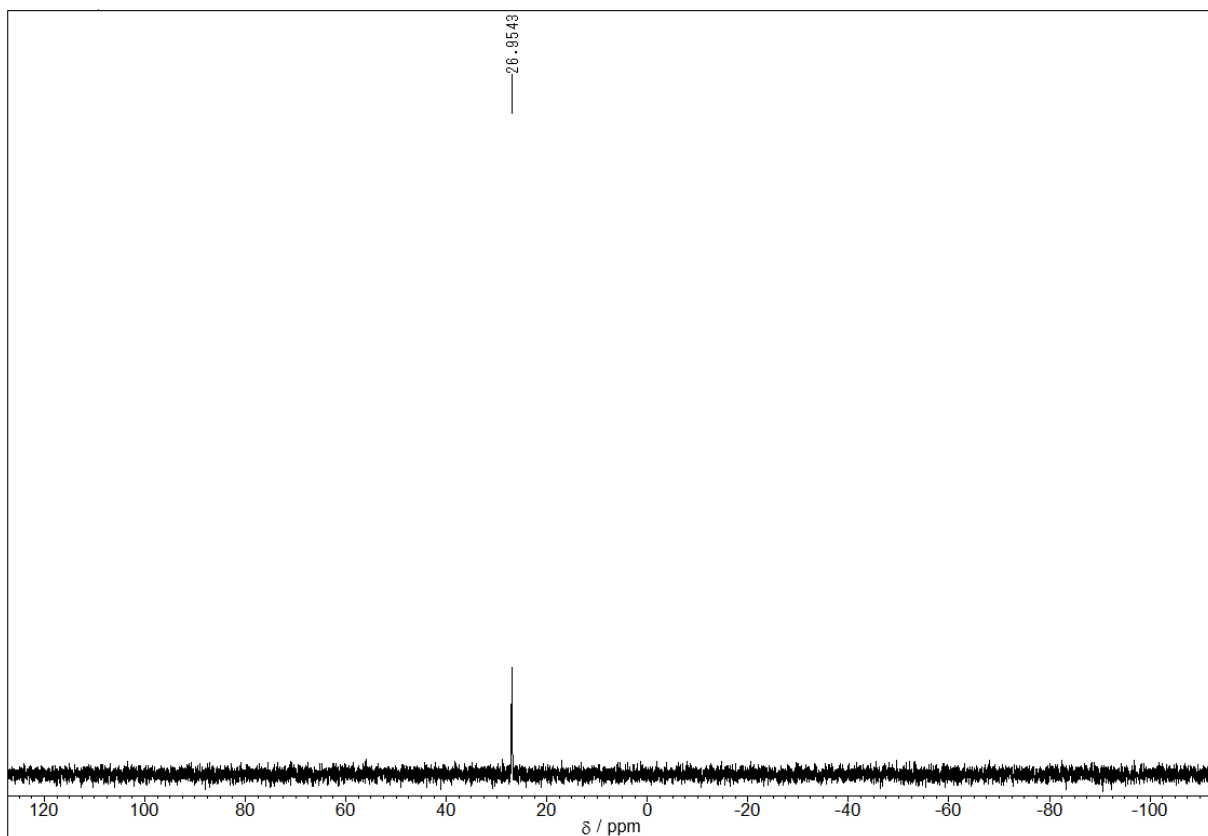

Figure S11.  $^{31}\text{P}$  NMR spectrum of **3** (162 MHz, acetone- $d_6$ ).

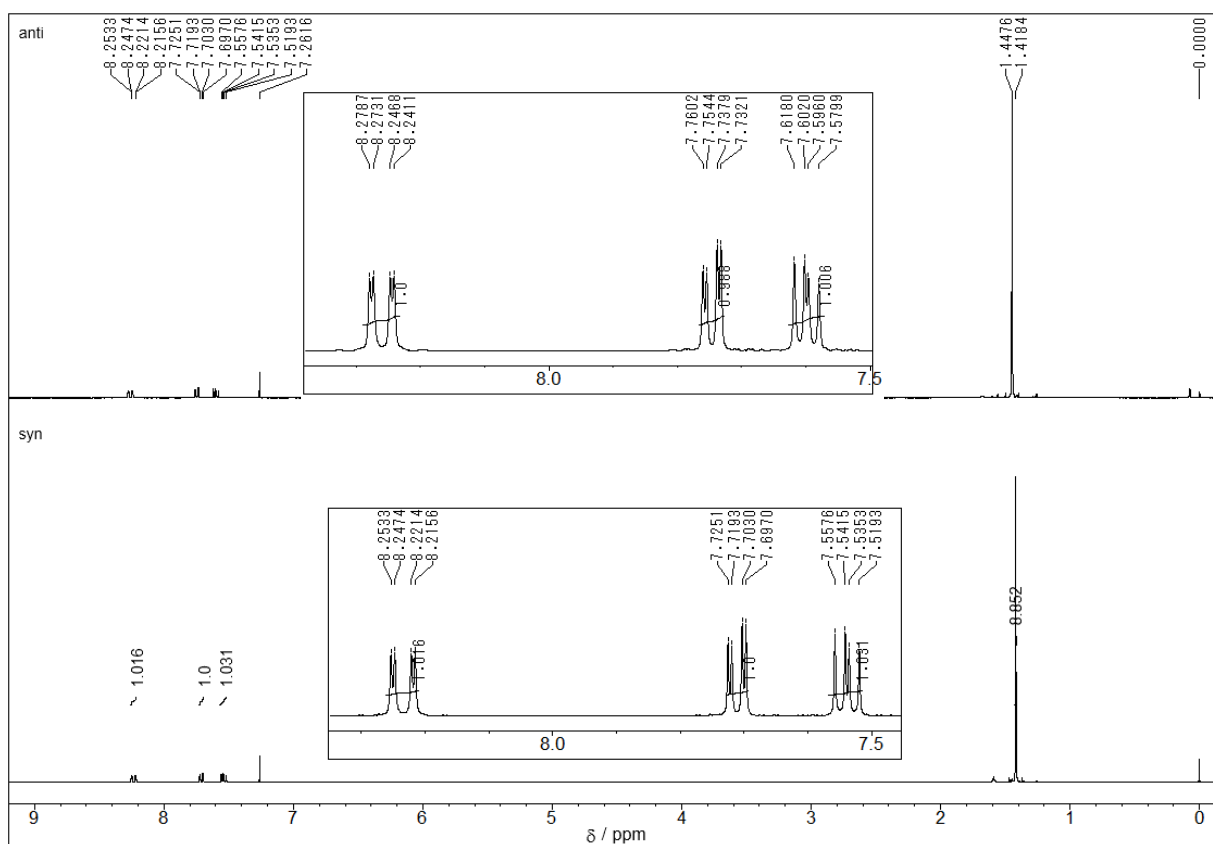

Figure S12.  $^1\text{H}$  NMR spectra of **P2'** (Top) and **P2** (bottom) (400 MHz,  $\text{CDCl}_3$ ).

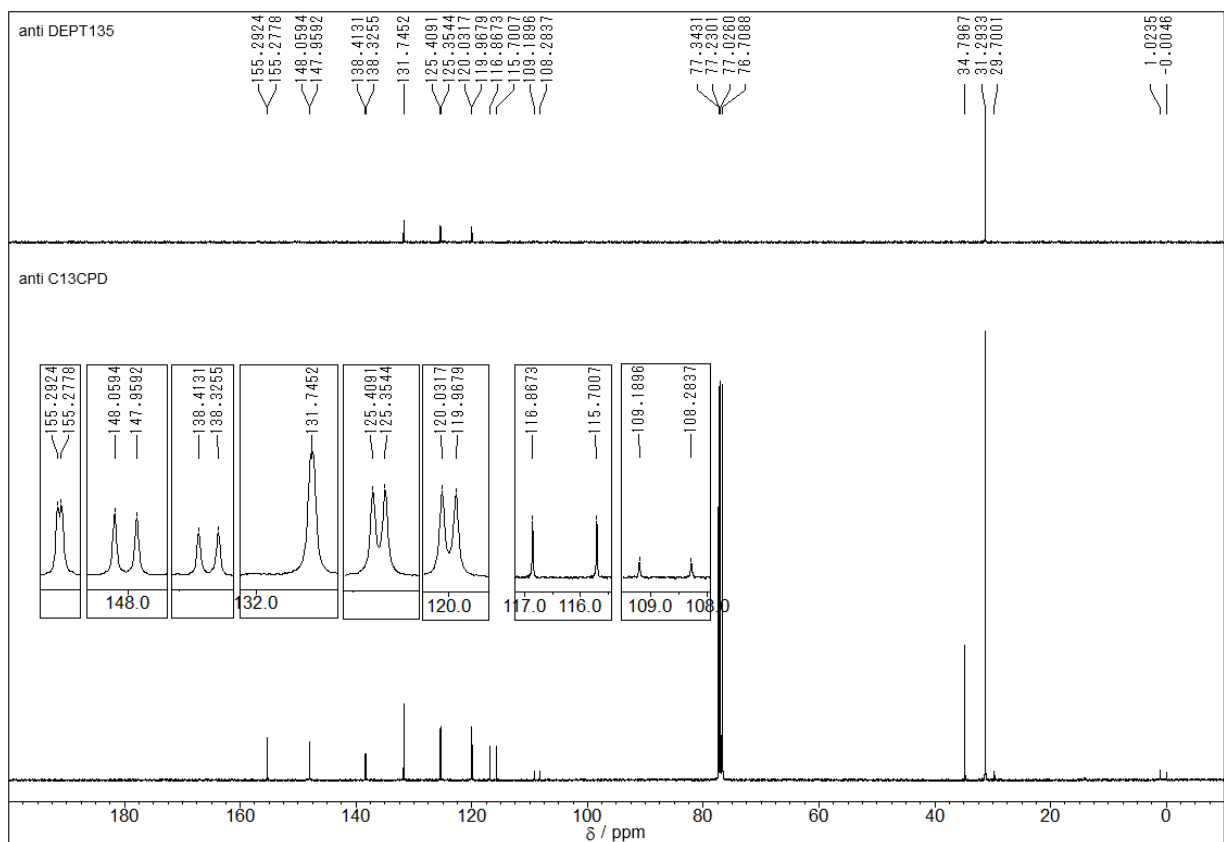

Figure S13.  $^{13}\text{C}$  NMR spectrum of **P2'** (100 MHz,  $\text{CDCl}_3$ ).

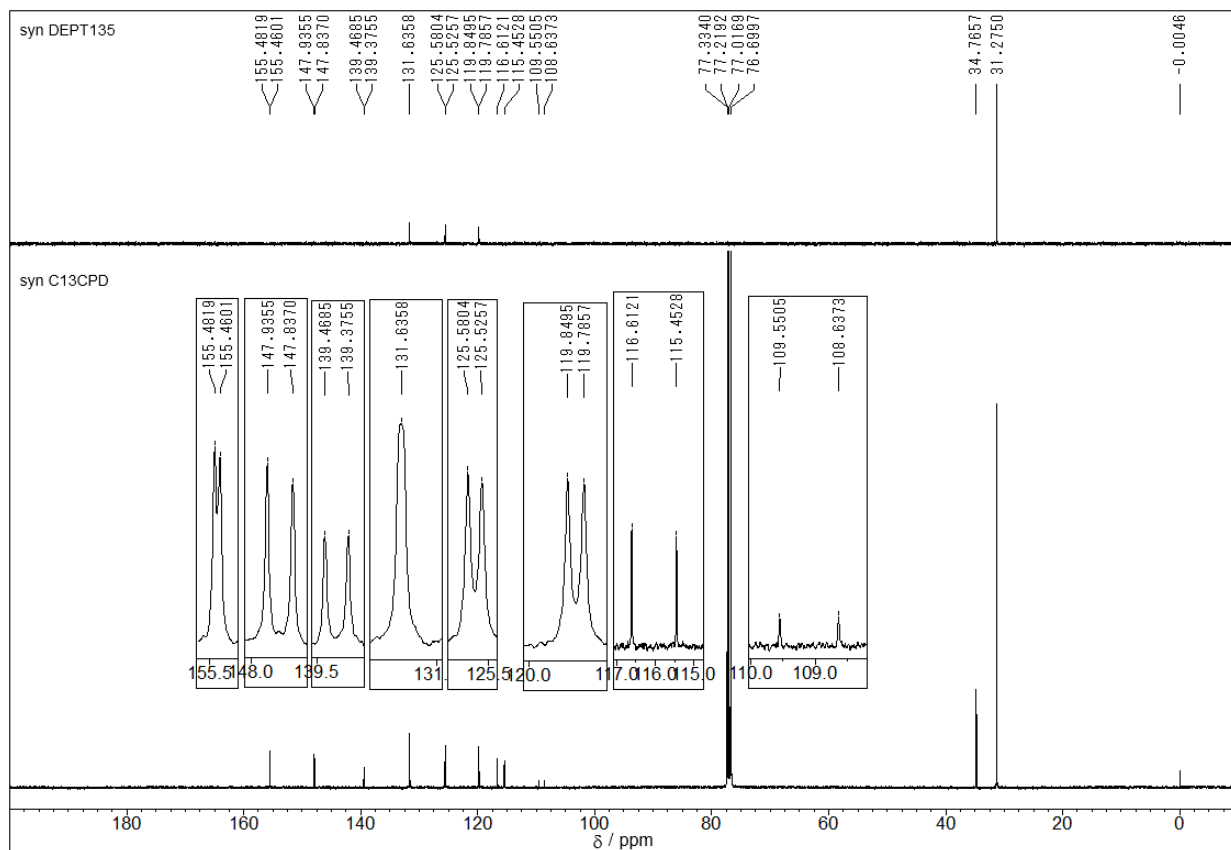

Figure S14.  $^{13}\text{C}$  NMR spectrum of **P2** (100 MHz,  $\text{CDCl}_3$ ).

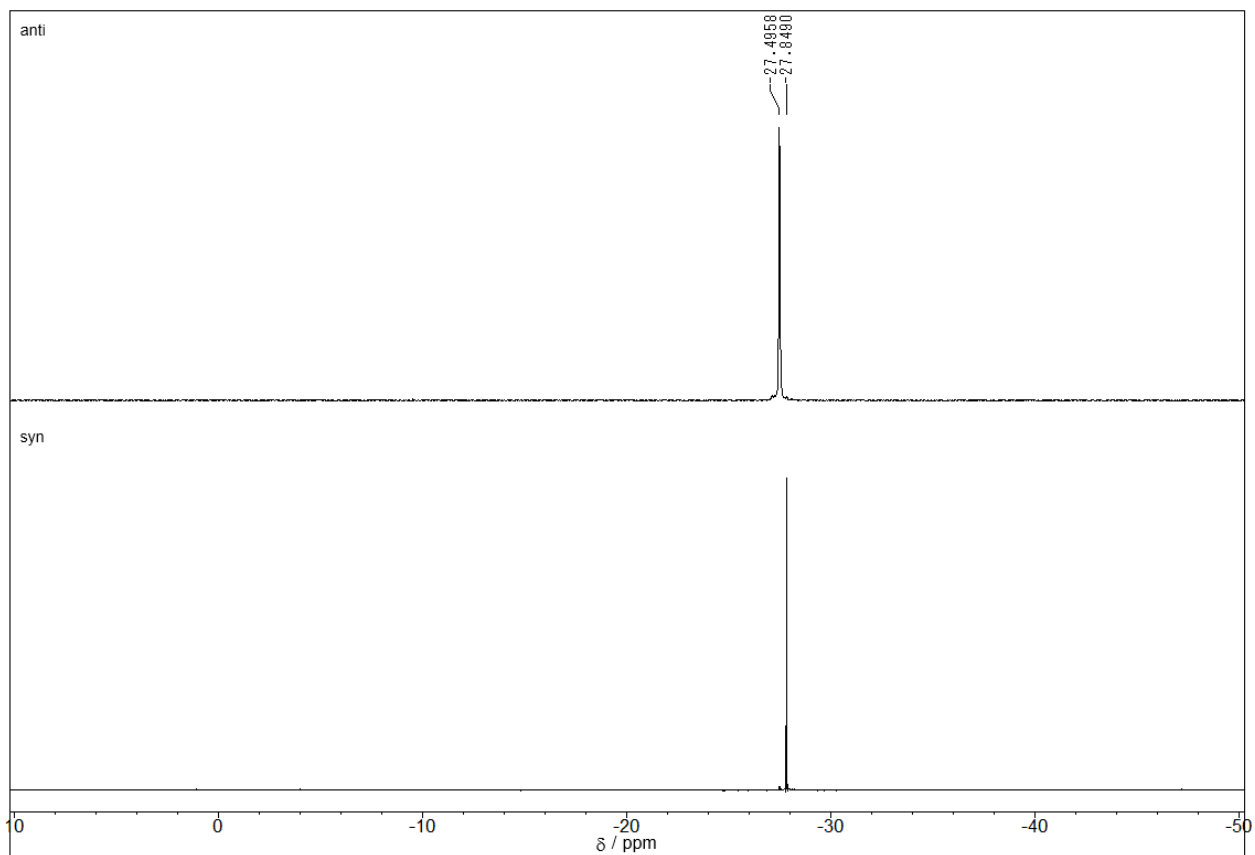

**Figure S15.**  $^{31}\text{P}$  NMR spectrum of **P2'** (Top) and **P2** (bottom) (162 MHz,  $\text{CDCl}_3$ ).

#### (4) MALDI TOF MS

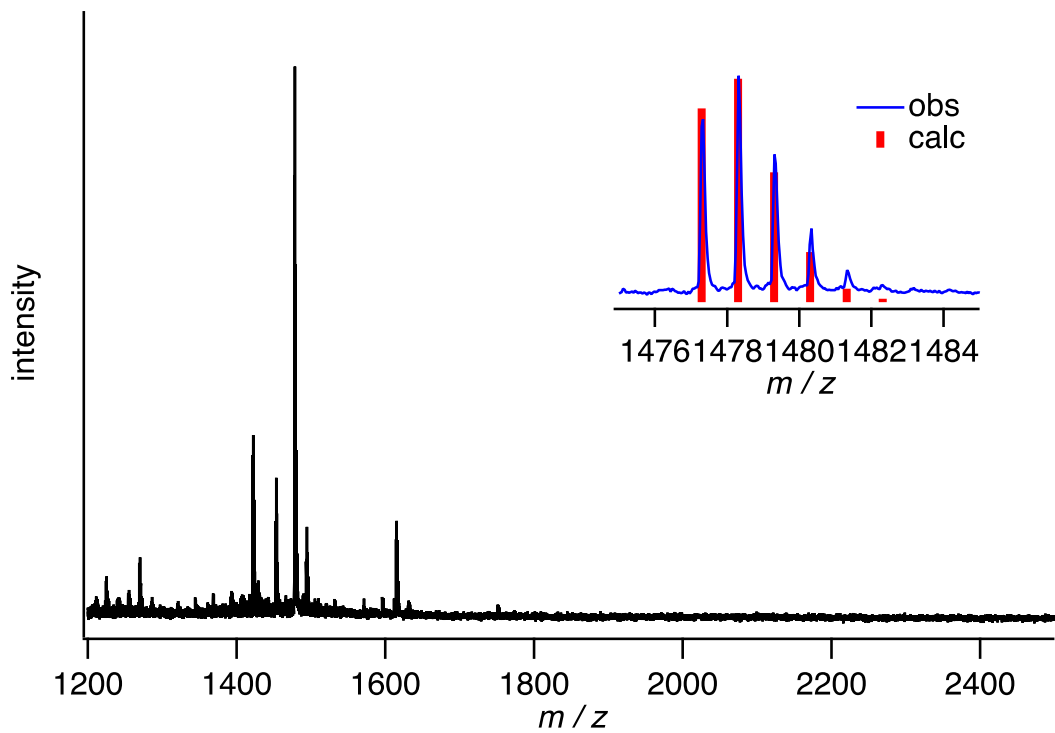

Figure S16. MALDI TOF MS of  $(\mathbf{P2})_2\text{C}_{60}$ . Inset shows calculated isotope peaks for  $[\mathbf{P2}\text{C}_{60}\text{-H}]^-$ .

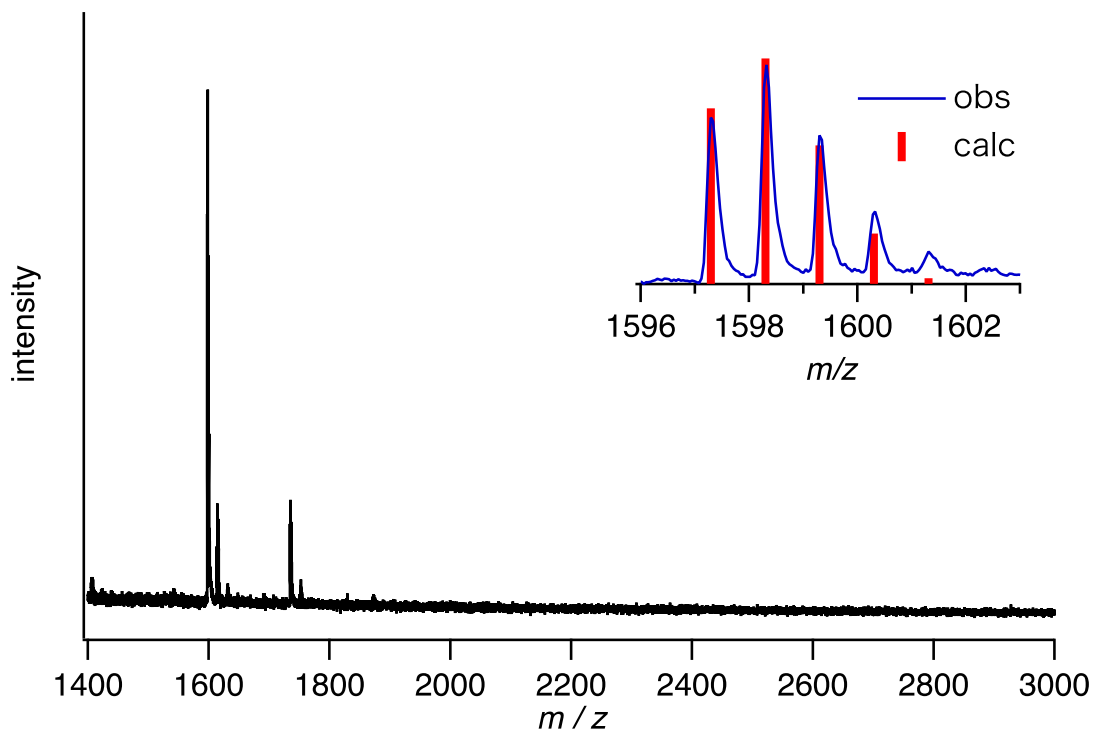

Figure S17. MALDI TOF MS of  $(\mathbf{P2})_2\text{C}_{70}$ . Inset shows calculated isotope peaks for  $[\mathbf{P2}\text{C}_{70}\text{-H}]^-$ .

(5) UV-vis spectra

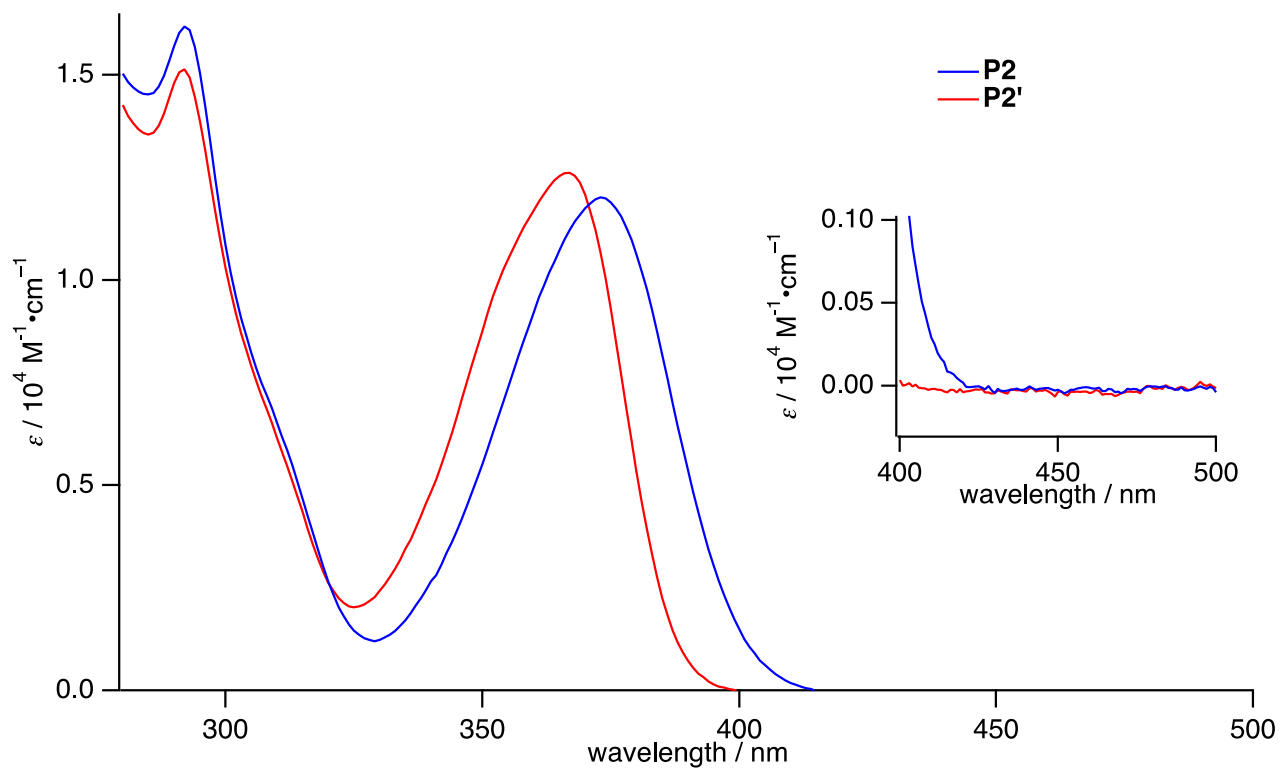

**Figure S18.** UV-vis absorption spectra of **P2** and **P2'** (CHCl<sub>3</sub>, 10 μM).

(6) NMR spectral titration

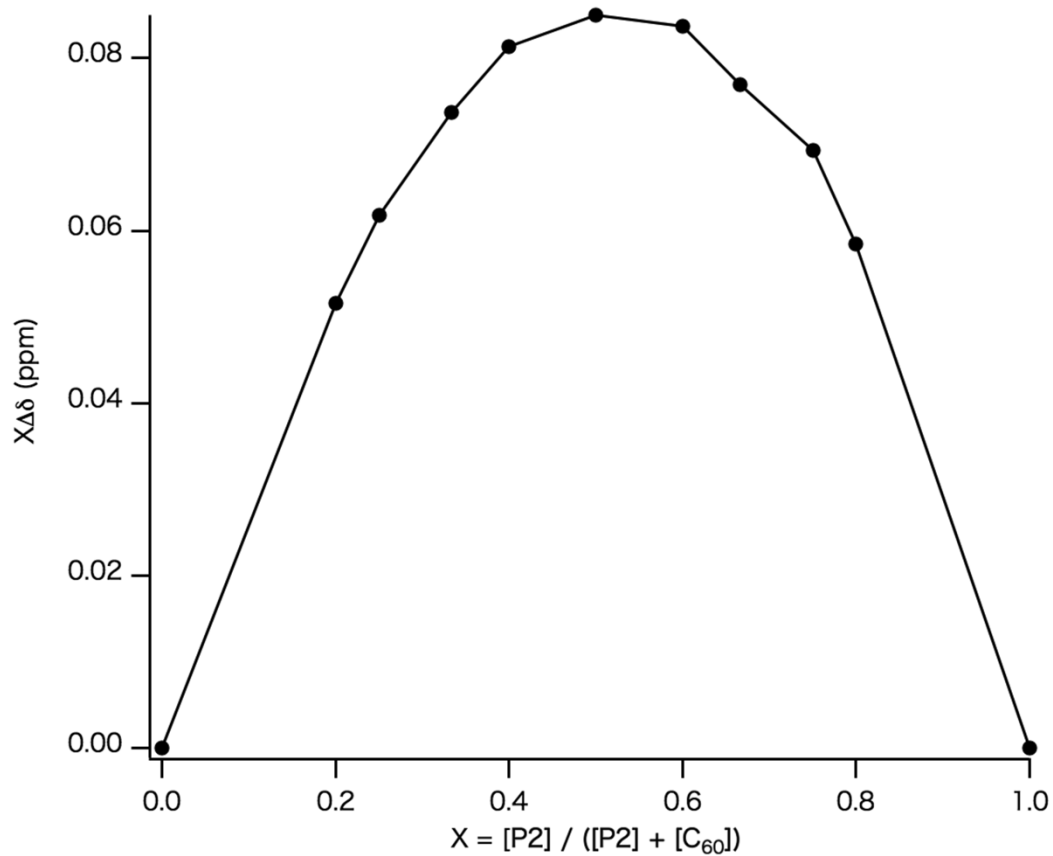

**Figure S19.** A Job plot for host-guest complexation of **P2** and C<sub>60</sub> using <sup>1</sup>H NMR (600 MHz, CDCl<sub>3</sub>/CS<sub>2</sub> (1:3 v/v), [P2] + [C<sub>60</sub>] = 2.7 mM).

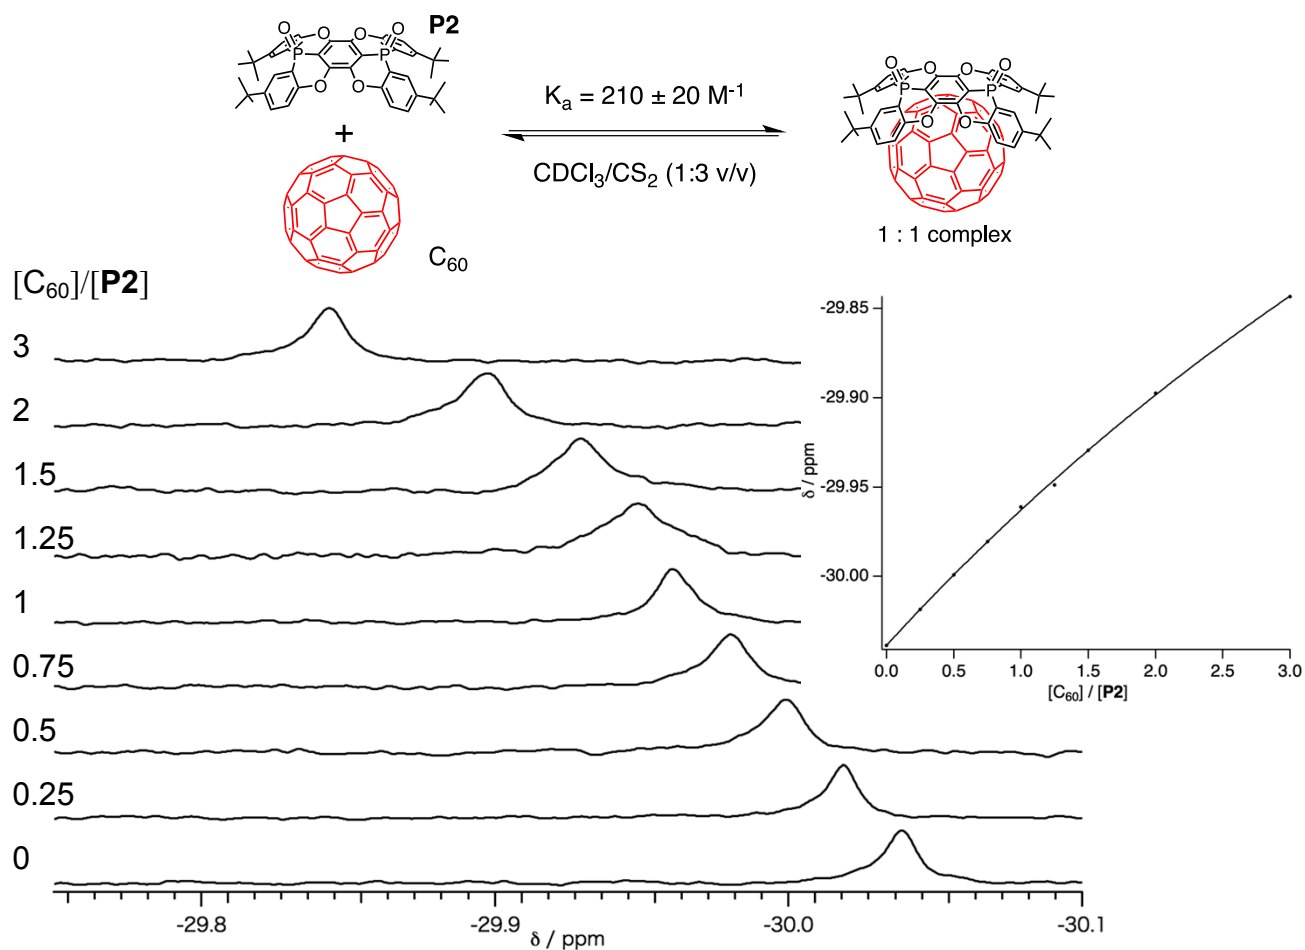

**Figure S20.**  $^{31}\text{P}$  NMR spectral change of **P2** upon addition of  $\text{C}_{60}$  (242 MHz,  $\text{CDCl}_3/\text{CS}_2$  (1:3 v/v),  $[\text{P2}] = 0.5 \text{ mM}$ ). Inset shows 1:1 binding isotherm.

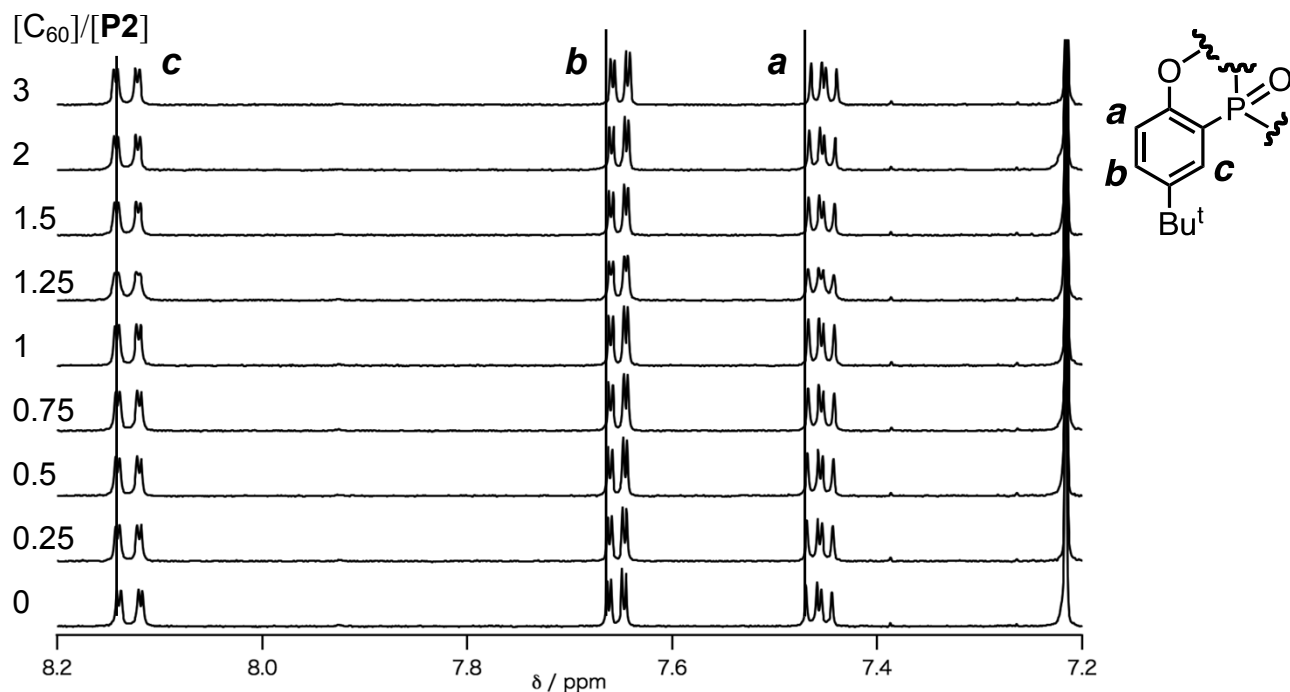

**Figure S21.**  $^1\text{H}$  NMR spectral change of **P2** upon the addition of  $\text{C}_{60}$  (600 MHz,  $\text{CDCl}_3/\text{CS}_2$  (1:3 v/v),  $[\text{P2}] = 0.5 \text{ mM}$ ). Dot lines are overlapped to emphasize chemical shift changes.



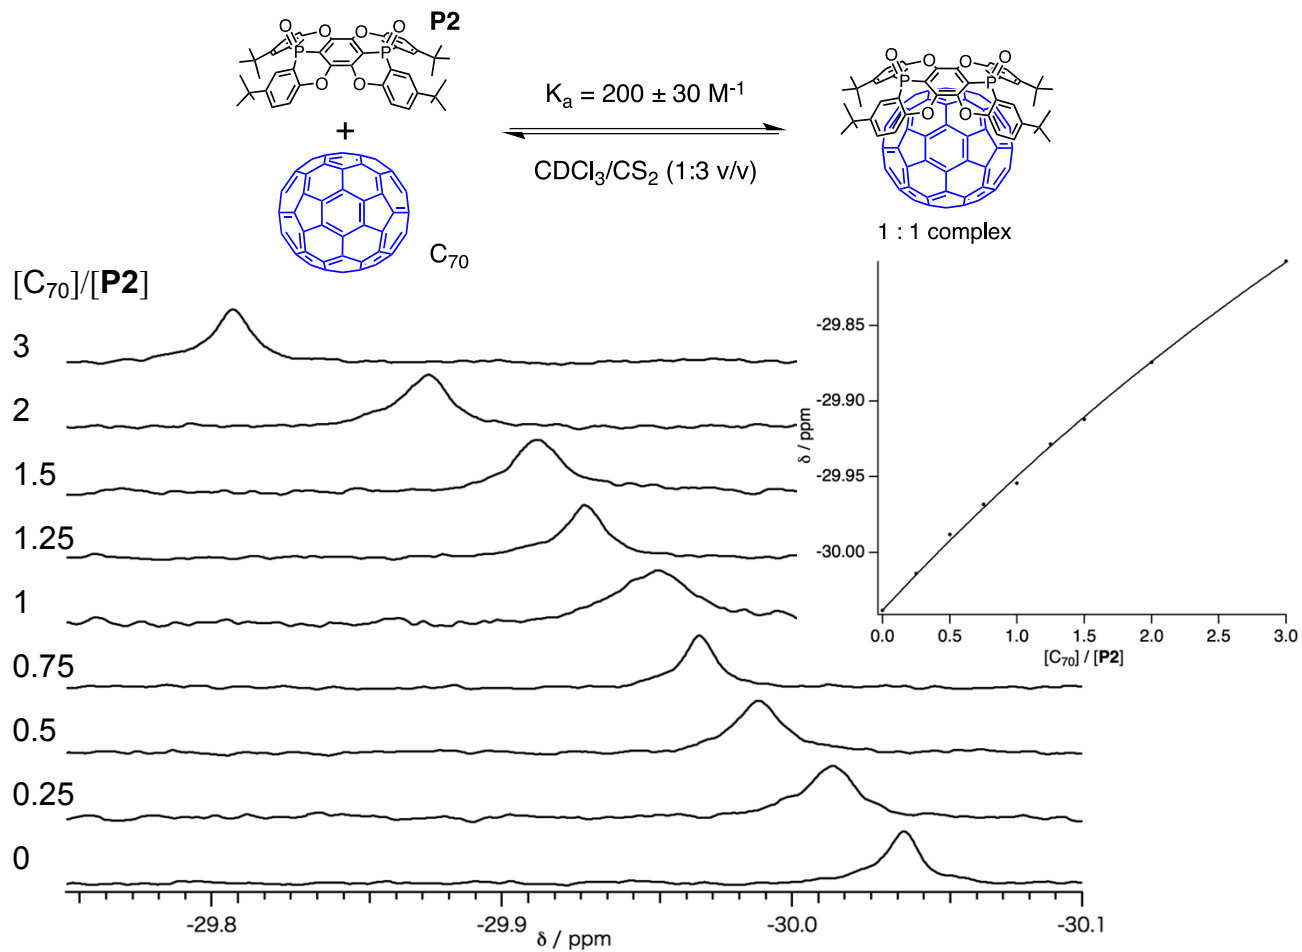

**Figure S22.**  $^{31}\text{P}$  NMR spectral change of **P2** upon addition of  $\text{C}_{70}$  (242 MHz,  $\text{CDCl}_3/\text{CS}_2$  (1:3 v/v),  $[\text{P2}] = 0.5 \text{ mM}$ ). Inset shows 1:1 binding isotherm.

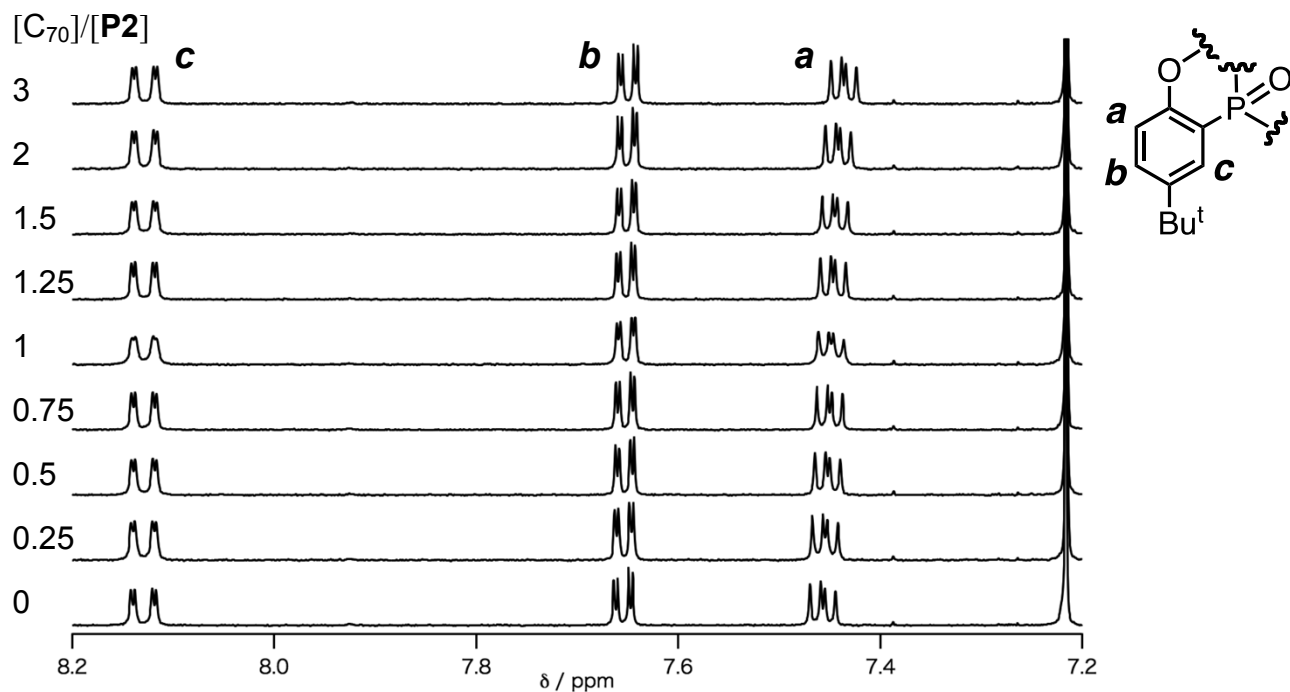

**Figure S23.**  $^1\text{H}$  NMR spectral change of **P2** upon the addition of  $\text{C}_{70}$  (600 MHz,  $\text{CDCl}_3/\text{CS}_2$  (1:3 v/v),  $[\text{P2}] = 0.5 \text{ mM}$ ).

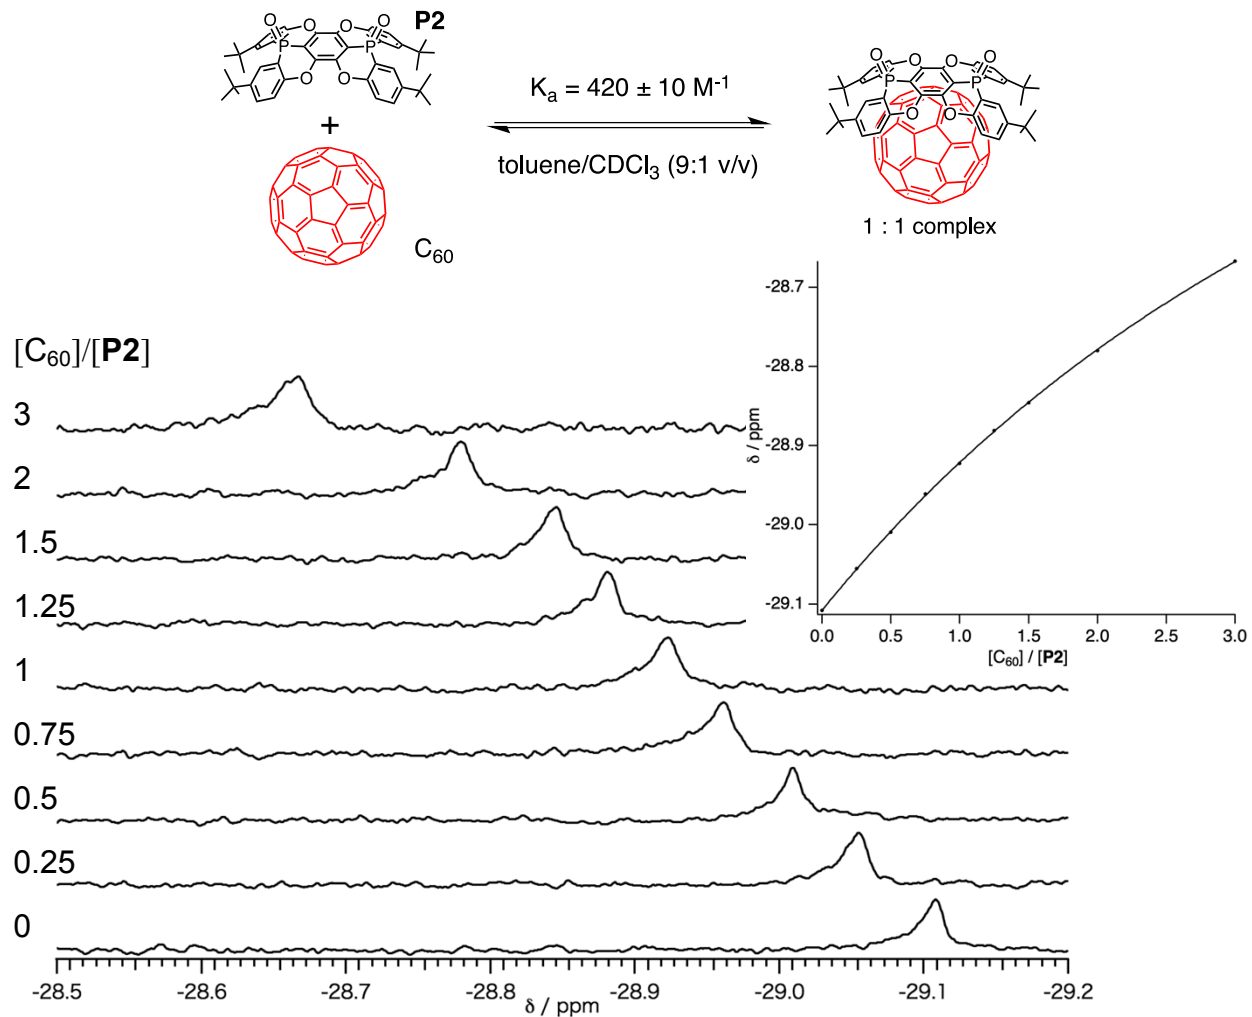

**Figure S24.**  $^{31}\text{P}$  NMR spectral change of **P2** upon the addition of  $\text{C}_{60}$  (243 MHz, toluene/ $\text{CDCl}_3$  (9:1 v/v),  $[\text{P2}] = 0.5 \text{ mM}$ ). Inset shows 1:1 binding isotherm.

(6) UV-vis absorption spectral titration

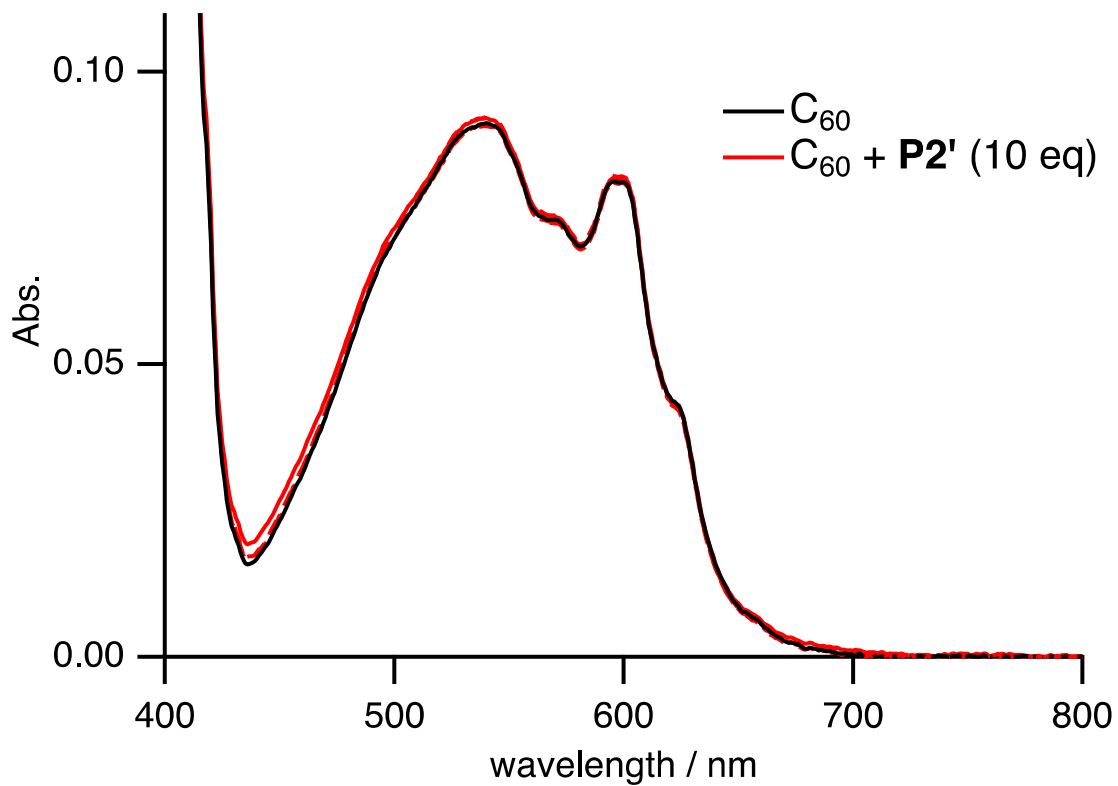

**Figure S25.** UV-vis spectral change of C<sub>60</sub> upon the addition of P2' ([C<sub>60</sub>] = 0.1 mM,  $0 \leq [\text{P2}']/[\text{C}_{60}] \leq 10$ , CHCl<sub>3</sub>/toluene (1:4 v/v)).

## (7) X-ray Crystallographic Analysis

X-ray diffraction measurements were performed using a Bruker APEXII ULTRA. The X-ray diffraction intensities were collected on a CCD diffractometer at 120 K using MoK $\alpha$  (graphite-monochromated,  $\lambda = 0.71073 \text{ \AA}$ ) radiation. The data were integrated with SAINT (Bruker, 2004), and an empirical absorption correction (SADABS) was applied. The structure was solved by the direct method of SHELXD-2014 and refined using the SHELXL-2014 program.<sup>[S2]</sup> All of the positional parameters and thermal parameters of non-hydrogen atoms were anisotropically refined on  $F^2$  by the full-matrix least-squares method. Hydrogen atoms were placed at the calculated positions and refined riding on their corresponding carbon atoms. The crystallographic data for **P2**, **P2'**, (**P2**)<sub>2</sub>⊃C<sub>60</sub> (**I**), (**P2**)<sub>2</sub>⊃C<sub>60</sub> (**II**), (**P2**)<sub>2</sub>⊃C<sub>60</sub> (**III**), (**P2**)<sub>2</sub>⊃C<sub>70</sub> (**IV**), and (**P2**)<sub>2</sub>⊃C<sub>70</sub> (**V**) were deposited with the Cambridge Crystallographic Data Center as supplementary publications CCDC 1401373-1401379. Copies of the data can be obtained free of charge on application to CCDC, 12 Union Road, Cambridge CB2 1EZ, U.K. (fax: (+44) 1223-336-033; email: deposit@ccdc.cam.ac.uk).

A small depth  $d$  is defined as a distance between the centroids of the central benzene ring and the plane of the terminal carbons of the four benzene rings. A large depth  $D$  is defined as a distance between the centroids of the central benzene ring and the plane of the terminal carbons of the four *tert*-butyl groups.

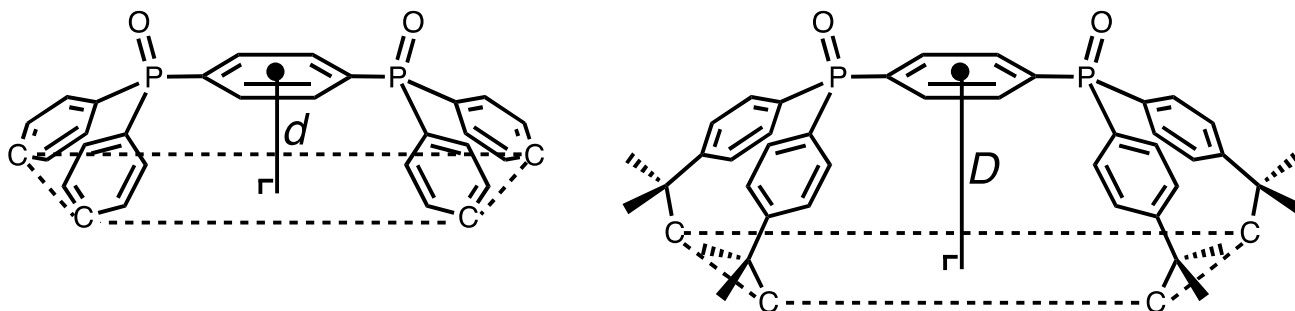

**Figure S26.** Definition of small depth  $d$  and large depth  $D$ .

**Table S1.** Crystallographic data.

|                                                    | <b>P2</b> ( <i>syn</i> )                                                                         | <b>P2'</b> ( <i>anti</i> )                                                                                   | <b>(P2)<sub>2</sub>⊃C<sub>60</sub></b> ( <b>I</b> )                                            |
|----------------------------------------------------|--------------------------------------------------------------------------------------------------|--------------------------------------------------------------------------------------------------------------|------------------------------------------------------------------------------------------------|
| Composite                                          | C <sub>46</sub> H <sub>48</sub> O <sub>6</sub> P <sub>2</sub> ·(CHCl <sub>3</sub> ) <sub>4</sub> | C <sub>46</sub> H <sub>48</sub> O <sub>6</sub> P <sub>2</sub> ·(C <sub>7</sub> H <sub>8</sub> ) <sub>2</sub> | (C <sub>46</sub> H <sub>48</sub> O <sub>6</sub> P <sub>2</sub> ) <sub>2</sub> ·C <sub>60</sub> |
| Formula                                            | C <sub>50</sub> H <sub>52</sub> O <sub>6</sub> P <sub>2</sub> Cl <sub>12</sub>                   | C <sub>60</sub> H <sub>64</sub> O <sub>6</sub> P <sub>2</sub>                                                | C <sub>152</sub> H <sub>96</sub> O <sub>12</sub> P <sub>4</sub>                                |
| Formula weight                                     | 1236.26                                                                                          | 943.05                                                                                                       | 2238.16                                                                                        |
| Crystal size (mm <sup>3</sup> )                    | 0.60 × 0.40 × 0.10                                                                               | 0.30 × 0.05 × 0.05                                                                                           | 0.20 × 0.05 × 0.05                                                                             |
| Crystal system                                     | monoclinic                                                                                       | triclinic                                                                                                    | monoclinic                                                                                     |
| Space group                                        | <i>P2</i> <sub>1</sub> / <i>c</i>                                                                | <i>P</i> -1                                                                                                  | <i>C2</i> / <i>m</i>                                                                           |
| <i>a</i> (Å)                                       | 12.0579(14)                                                                                      | 11.135(2)                                                                                                    | 34.540(2)                                                                                      |
| <i>b</i> (Å)                                       | 17.329(2)                                                                                        | 11.644(3)                                                                                                    | 42.038(3)                                                                                      |
| <i>c</i> (Å)                                       | 27.445(3)                                                                                        | 12.132(3)                                                                                                    | 17.4446(11)                                                                                    |
| <i>α</i> (deg)                                     | 90                                                                                               | 97.161(2)                                                                                                    | 90                                                                                             |
| <i>β</i> (deg)                                     | 91.2630(10)                                                                                      | 111.866(2)                                                                                                   | 100.248(3)                                                                                     |
| <i>γ</i> (deg)                                     | 90                                                                                               | 112.432(2)                                                                                                   | 90                                                                                             |
| <i>V</i> (Å <sup>3</sup> )                         | 5733.4(12)                                                                                       | 1282.4(5)                                                                                                    | 24925(3)                                                                                       |
| <i>Z</i>                                           | 4                                                                                                | 1                                                                                                            | 8                                                                                              |
| <i>D</i> <sub>calcd</sub> (g·cm <sup>-3</sup> )    | 1.432                                                                                            | 1.221                                                                                                        | 1.193                                                                                          |
| Collected/Unique                                   | 32282/13151                                                                                      | 32000/6222                                                                                                   | 439608/ 46996                                                                                  |
| <i>R</i> <sub>int</sub>                            | 0.0228                                                                                           | 0.0431                                                                                                       | 0.0749                                                                                         |
| <i>θ</i> <sub>max</sub> (deg)                      | 27.59                                                                                            | 28.22                                                                                                        | 25.24                                                                                          |
| <i>F</i> <sub>000</sub>                            | 2536                                                                                             | 502                                                                                                          | 9312                                                                                           |
| <i>μ</i> (MoKα) (mm <sup>-1</sup> )                | 0.681                                                                                            | 0.136                                                                                                        | 0.312                                                                                          |
| Limiting indices                                   | -15 ≤ <i>h</i> ≤ 14<br>-21 ≤ <i>k</i> ≤ 22<br>-35 ≤ <i>l</i> ≤ 32                                | -14 ≤ <i>h</i> ≤ 14<br>-15 ≤ <i>k</i> ≤ 15<br>-16 ≤ <i>l</i> ≤ 16                                            | -53 ≤ <i>h</i> ≤ 52<br>-63 ≤ <i>k</i> ≤ 63<br>-26 ≤ <i>l</i> ≤ 26                              |
| Parameters/restraints                              | 697/0                                                                                            | 314/0                                                                                                        | 1450/127                                                                                       |
| Goodness of fit ( <i>F</i> <sup>2</sup> )          | 1.057                                                                                            | 1.019                                                                                                        | 1.233                                                                                          |
| <i>R</i> <sub>1</sub> ( <i>I</i> > 2σ( <i>I</i> )) | 0.0421                                                                                           | 0.0447                                                                                                       | 0.1314                                                                                         |
| <i>wR</i> <sub>2</sub> (all date)                  | 0.1097                                                                                           | 0.1149                                                                                                       | 0.3117                                                                                         |
| Largest peak (e·Å <sup>-3</sup> )                  | 0.631                                                                                            | 0.559                                                                                                        | 1.758                                                                                          |
| Largest hole (e·Å <sup>-3</sup> )                  | -0.480                                                                                           | -0.416                                                                                                       | -2.258                                                                                         |

$$R_1 = \sum ||F_o| - |F_c| / \sum |F_o| , \quad wR_2 = \{ \sum [w(F_o^2 - F_c^2)^2] / \sum [w(F_o^2)^2] \}^{1/2}$$

|                                                             | (P2) <sub>2</sub> ⊃C <sub>60</sub> (II)                                                        | (P2) <sub>2</sub> ⊃C <sub>60</sub> (III)                                                                                              | (P2) <sub>2</sub> ⊃C <sub>70</sub> (IV)                                                                                               |
|-------------------------------------------------------------|------------------------------------------------------------------------------------------------|---------------------------------------------------------------------------------------------------------------------------------------|---------------------------------------------------------------------------------------------------------------------------------------|
| Composite                                                   | (C <sub>46</sub> H <sub>48</sub> O <sub>6</sub> P <sub>2</sub> ) <sub>2</sub> ·C <sub>60</sub> | (C <sub>46</sub> H <sub>48</sub> O <sub>6</sub> P <sub>2</sub> ) <sub>2</sub> ·C <sub>60</sub> ·<br>(CHCl <sub>3</sub> ) <sub>4</sub> | (C <sub>46</sub> H <sub>48</sub> O <sub>6</sub> P <sub>2</sub> ) <sub>2</sub> ·C <sub>70</sub> ·<br>(CHCl <sub>3</sub> ) <sub>2</sub> |
| Formula                                                     | C <sub>152</sub> H <sub>96</sub> O <sub>12</sub> P <sub>4</sub>                                | C <sub>156</sub> H <sub>100</sub> O <sub>12</sub> P <sub>4</sub> Cl <sub>12</sub>                                                     | C <sub>164</sub> H <sub>98</sub> O <sub>12</sub> P <sub>4</sub> Cl <sub>6</sub>                                                       |
| Formula weight                                              | 2238.16                                                                                        | 2715.64                                                                                                                               | 2597.0                                                                                                                                |
| Crystal size (mm <sup>3</sup> )                             | 0.10 × 0.05 × 0.05                                                                             | 0.15 × 0.10 × 0.05                                                                                                                    | 0.30 × 0.15 × 0.03                                                                                                                    |
| Crystal system                                              | monoclinic                                                                                     | monoclinic                                                                                                                            | orthorhombic                                                                                                                          |
| Space group                                                 | <i>P</i> 2 <sub>1</sub> / <i>c</i>                                                             | <i>C</i> 2/ <i>c</i>                                                                                                                  | <i>P</i> 2 <sub>1</sub> 2 <sub>1</sub> 2                                                                                              |
| <i>a</i> (Å)                                                | 24.148(8)                                                                                      | 25.827(5)                                                                                                                             | 21.980(5)                                                                                                                             |
| <i>b</i> (Å)                                                | 23.858(8)                                                                                      | 22.684(4)                                                                                                                             | 17.101(4)                                                                                                                             |
| <i>c</i> (Å)                                                | 22.983(8)                                                                                      | 22.259(4)                                                                                                                             | 17.472(4)                                                                                                                             |
| <i>α</i> (deg)                                              | 90                                                                                             | 90                                                                                                                                    | 90                                                                                                                                    |
| <i>β</i> (deg)                                              | 117.759(4)                                                                                     | 99.466(2)                                                                                                                             | 90                                                                                                                                    |
| <i>γ</i> (deg)                                              | 90                                                                                             | 90                                                                                                                                    | 90                                                                                                                                    |
| <i>V</i> (Å <sup>3</sup> )                                  | 11717(7)                                                                                       | 12863(4)                                                                                                                              | 6567(2)                                                                                                                               |
| <i>Z</i>                                                    | 4                                                                                              | 4                                                                                                                                     | 2                                                                                                                                     |
| <i>D</i> <sub>calcd</sub> (g·cm <sup>-3</sup> )             | 1.269                                                                                          | 1.402                                                                                                                                 | 1.313                                                                                                                                 |
| Collected/Unique                                            | 255517/28158                                                                                   | 36501/15982                                                                                                                           | 41016/12313                                                                                                                           |
| <i>R</i> <sub>int</sub>                                     | 0.0917                                                                                         | 0.0205                                                                                                                                | 0.0485                                                                                                                                |
| <i>θ</i> <sub>max</sub> (deg)                               | 25.242                                                                                         | 25.242                                                                                                                                | 25.242                                                                                                                                |
| <i>F</i> <sub>000</sub>                                     | 4656                                                                                           | 5584                                                                                                                                  | 2680                                                                                                                                  |
| <i>μ</i> (MoK $\alpha$ ) (mm <sup>-1</sup> )                | 0.131                                                                                          | 0.374                                                                                                                                 | 0.245                                                                                                                                 |
| Limiting indices                                            | -31 ≤ <i>h</i> ≤ 31<br>-31 ≤ <i>k</i> ≤ 31<br>-30 ≤ <i>l</i> ≤ 30                              | -34 ≤ <i>h</i> ≤ 33<br>-15 ≤ <i>k</i> ≤ 29<br>-27 ≤ <i>l</i> ≤ 29                                                                     | -26 ≤ <i>h</i> ≤ 24<br>-20 ≤ <i>k</i> ≤ 20<br>-21 ≤ <i>l</i> ≤ 21                                                                     |
| Parameters/restraints                                       | 1581/87                                                                                        | 868/69                                                                                                                                | 880/63                                                                                                                                |
| Goodness of fit ( <i>F</i> <sup>2</sup> )                   | 1.293                                                                                          | 1.365                                                                                                                                 | 1.073                                                                                                                                 |
| <i>R</i> <sub>1</sub> ( <i>I</i> > 2 $\sigma$ ( <i>I</i> )) | 0.1420                                                                                         | 0.1035                                                                                                                                | 0.0580                                                                                                                                |
| <i>wR</i> <sub>2</sub> (all date)                           | 0.3457                                                                                         | 0.2534                                                                                                                                | 0.1303                                                                                                                                |
| Largest peak (e·Å <sup>-3</sup> )                           | 1.276                                                                                          | 1.264                                                                                                                                 | 0.306                                                                                                                                 |
| Largest hole (e·Å <sup>-3</sup> )                           | -0.743                                                                                         | -0.986                                                                                                                                | -0.513                                                                                                                                |
| Flack                                                       |                                                                                                |                                                                                                                                       | 0.03(3)                                                                                                                               |

$$R_1 = \sum ||F_o| - |F_c| / \sum |F_o|, \quad wR_2 = \{ \sum [w(F_o^2 - F_c^2)^2] / \sum [w(F_o^2)^2] \}^{1/2}$$

| <b>(P2)<sub>2</sub>⊃C<sub>70</sub> (V)</b>                  |                                                                                                                                       |
|-------------------------------------------------------------|---------------------------------------------------------------------------------------------------------------------------------------|
| Composite                                                   | (C <sub>46</sub> H <sub>48</sub> O <sub>6</sub> P <sub>2</sub> ) <sub>2</sub> ·C <sub>70</sub> ·<br>(CHCl <sub>3</sub> ) <sub>4</sub> |
| Formula                                                     | C <sub>166</sub> H <sub>100</sub> O <sub>12</sub> P <sub>4</sub> Cl <sub>12</sub>                                                     |
| Formula weight                                              | 2835.7                                                                                                                                |
| Crystal size (mm <sup>3</sup> )                             | 0.25 × 0.05 × 0.05                                                                                                                    |
| Crystal system                                              | monoclinic                                                                                                                            |
| Space group                                                 | <i>C2/c</i>                                                                                                                           |
| <i>a</i> (Å)                                                | 34.079(12)                                                                                                                            |
| <i>b</i> (Å)                                                | 13.764(5)                                                                                                                             |
| <i>c</i> (Å)                                                | 27.024(10)                                                                                                                            |
| $\alpha$ (deg)                                              | 90                                                                                                                                    |
| $\beta$ (deg)                                               | 103.463(4)                                                                                                                            |
| $\gamma$ (deg)                                              | 90                                                                                                                                    |
| <i>V</i> (Å <sup>3</sup> )                                  | 12328(8)                                                                                                                              |
| <i>Z</i>                                                    | 4                                                                                                                                     |
| <i>D</i> <sub>calcd</sub> (g·cm <sup>-3</sup> )             | 1.528                                                                                                                                 |
| Collected/Unique                                            | 45630/8926                                                                                                                            |
| <i>R</i> <sub>int</sub>                                     | 0.1044                                                                                                                                |
| $\theta_{\max}$ (deg)                                       | 25.242                                                                                                                                |
| <i>F</i> <sub>000</sub>                                     | 5824                                                                                                                                  |
| $\mu$ (MoK $\alpha$ ) (mm <sup>-1</sup> )                   | 0.394                                                                                                                                 |
| Limiting indices                                            | $-36 \leq h \leq 37$<br>$-15 \leq k \leq 14$<br>$-29 \leq l \leq 29$                                                                  |
| Parameters/restraints                                       | 886/12                                                                                                                                |
| Goodness of fit ( <i>F</i> <sup>2</sup> )                   | 1.416                                                                                                                                 |
| <i>R</i> <sub>1</sub> ( <i>I</i> > 2 $\sigma$ ( <i>I</i> )) | 0.1447                                                                                                                                |
| <i>wR</i> <sub>2</sub> (all data)                           | 0.3803                                                                                                                                |
| Largest peak (e·Å <sup>-3</sup> )                           | 1.128                                                                                                                                 |
| Largest hole (e·Å <sup>-3</sup> )                           | -1.760                                                                                                                                |

$R_1 = \frac{\sum ||F_o| - |F_c||}{\sum |F_o|}$ ,  $wR_2 = \left\{ \frac{\sum [w(F_o^2 - F_c^2)^2]}{\sum [w(F_o^2)^2]} \right\}^{1/2}$

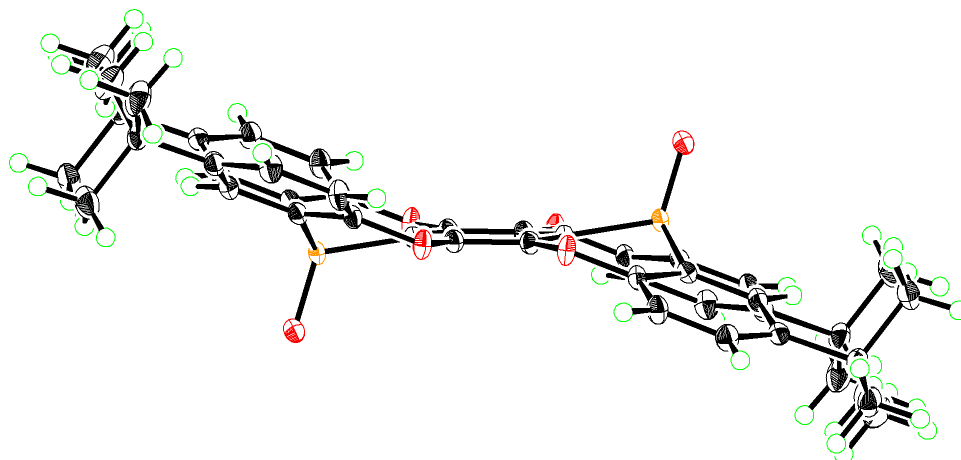

**Figure S27.** ORTEP drawing of **P2'**; top (left) and side (right) views; thermal ellipsoids set at 50% probability.

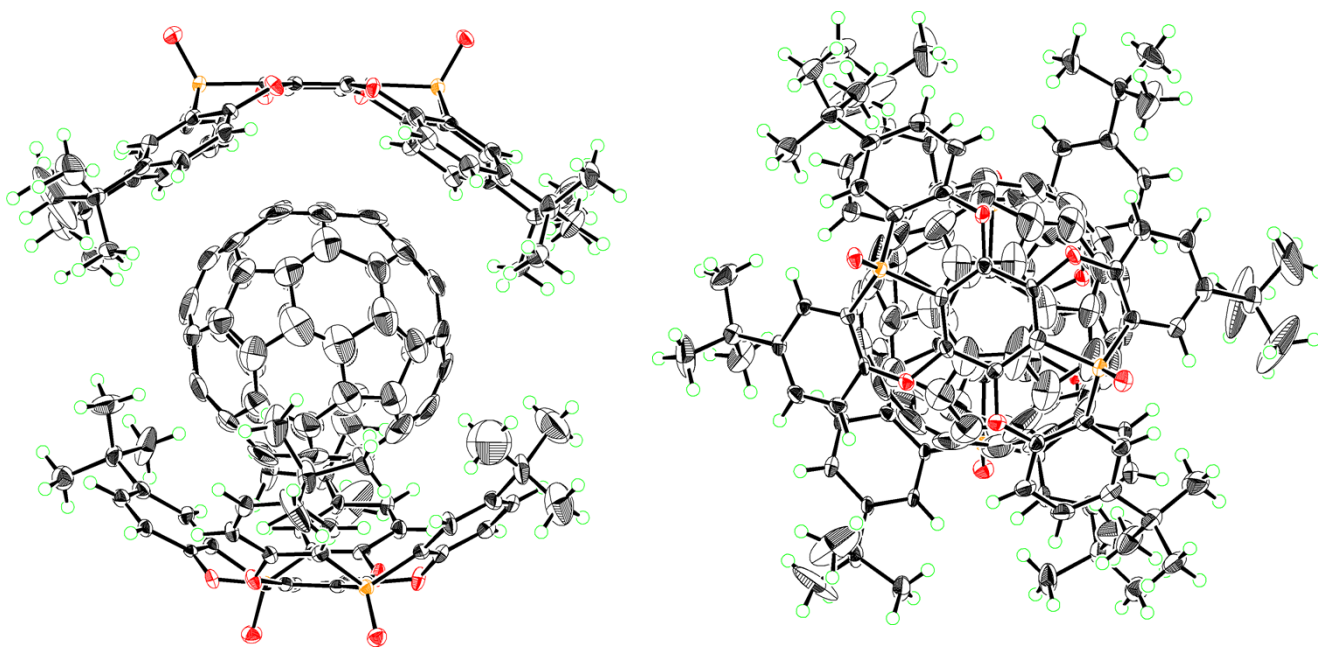

**Figure S28.** ORTEP drawing of **(P2)<sub>2</sub>C<sub>60</sub> (I)**; side (left) and top (right) views; thermal ellipsoids set at 50% probability.



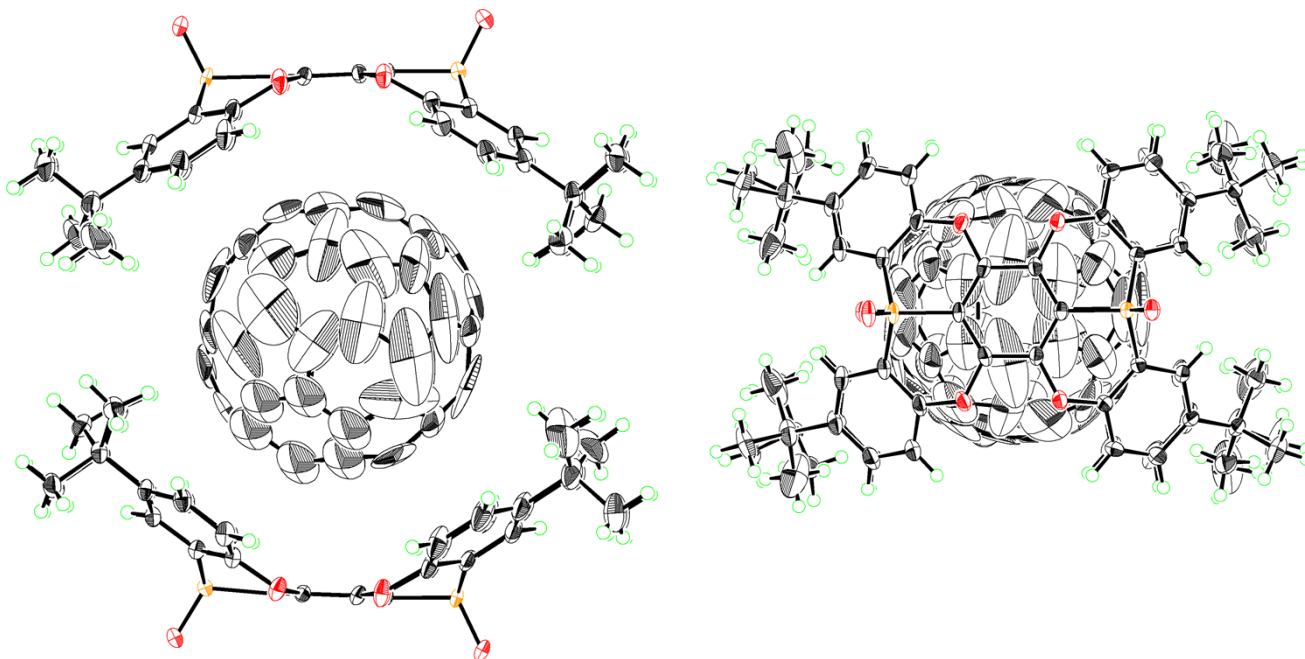

**Figure S29.** ORTEP drawing of one of the two independent molecules of  $(\text{P2})_2\text{C}_{60}$  (**II**); side (left) and top (right) views; thermal ellipsoids set at 50% probability.

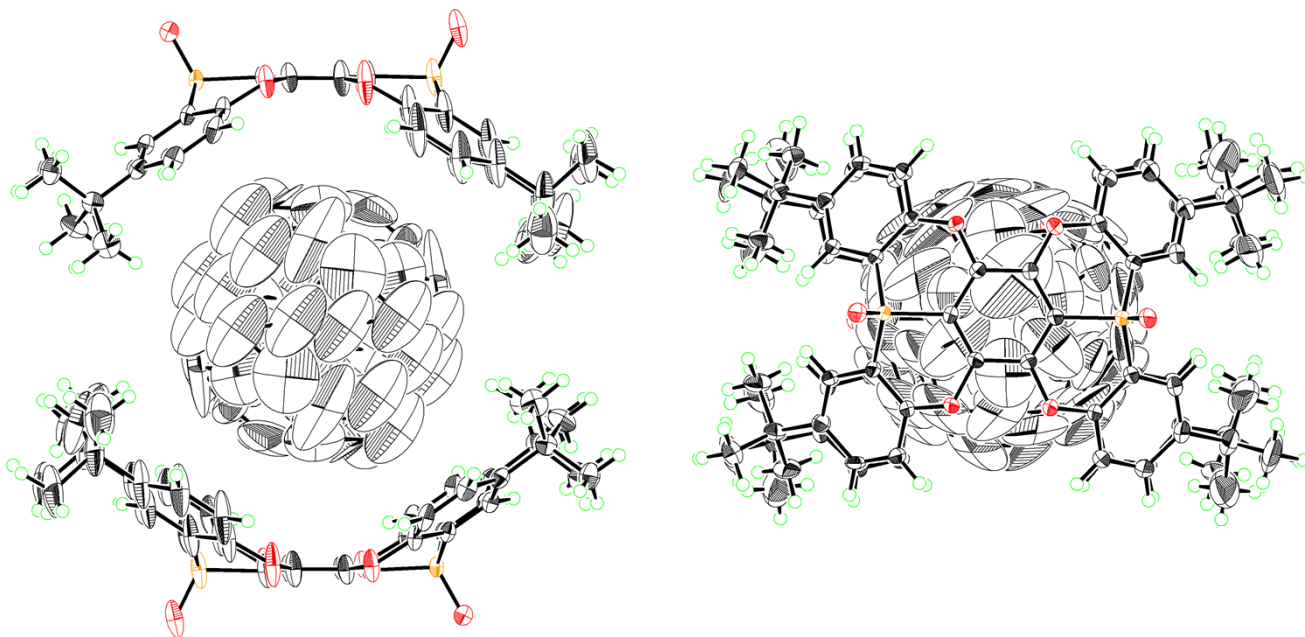

**Figure S30** ORTEP drawing of the other of the two independent molecules of  $(\text{P2})_2\text{C}_{60}$  (**II**) side (left) and top (right) views; thermal ellipsoids set at 50% probability.

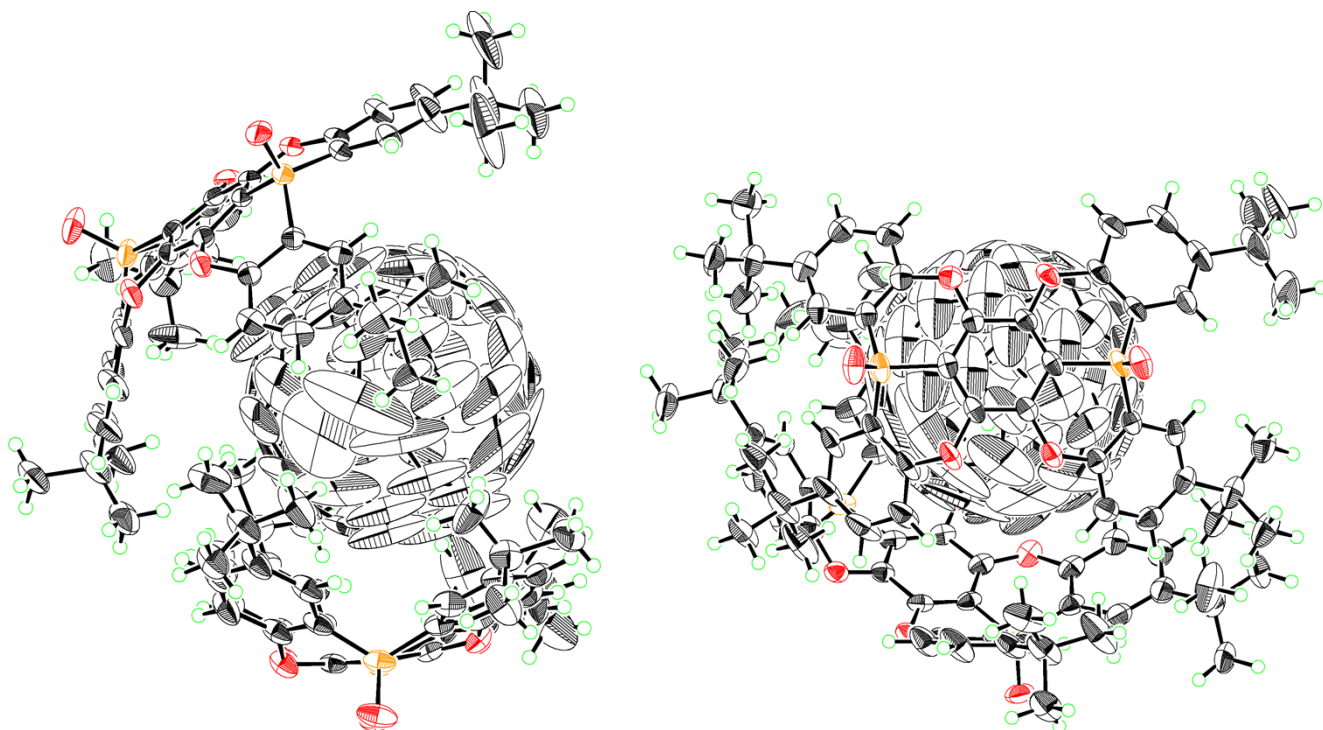

**Figure S31.** ORTEP drawing of  $(\text{P}2)_2\text{C}_{60}$  (III), top (left) and side (right) views; thermal ellipsoids set at 50% probability. Solvent molecules are omitted for clarity.

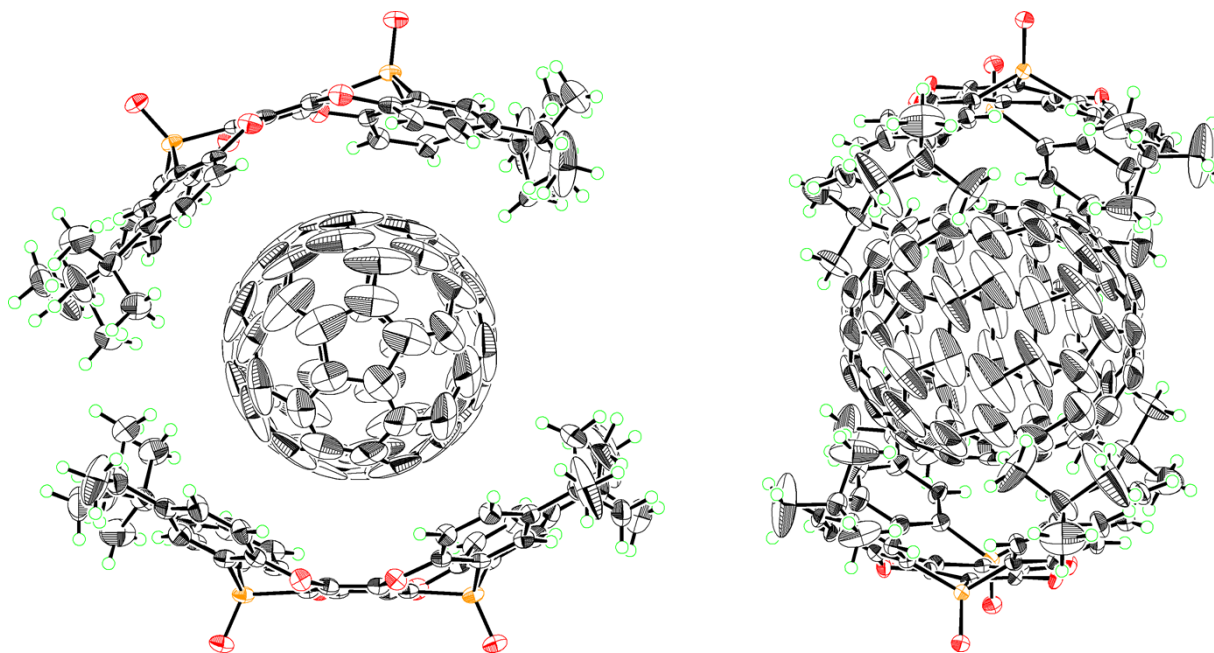

**Figure S32.** ORTEP drawing of  $(\text{P}2)_2\text{C}_{70}$  (IV), top (left) and side (right) views; thermal ellipsoids set at 50% probability. Solvent molecules are omitted for clarity.

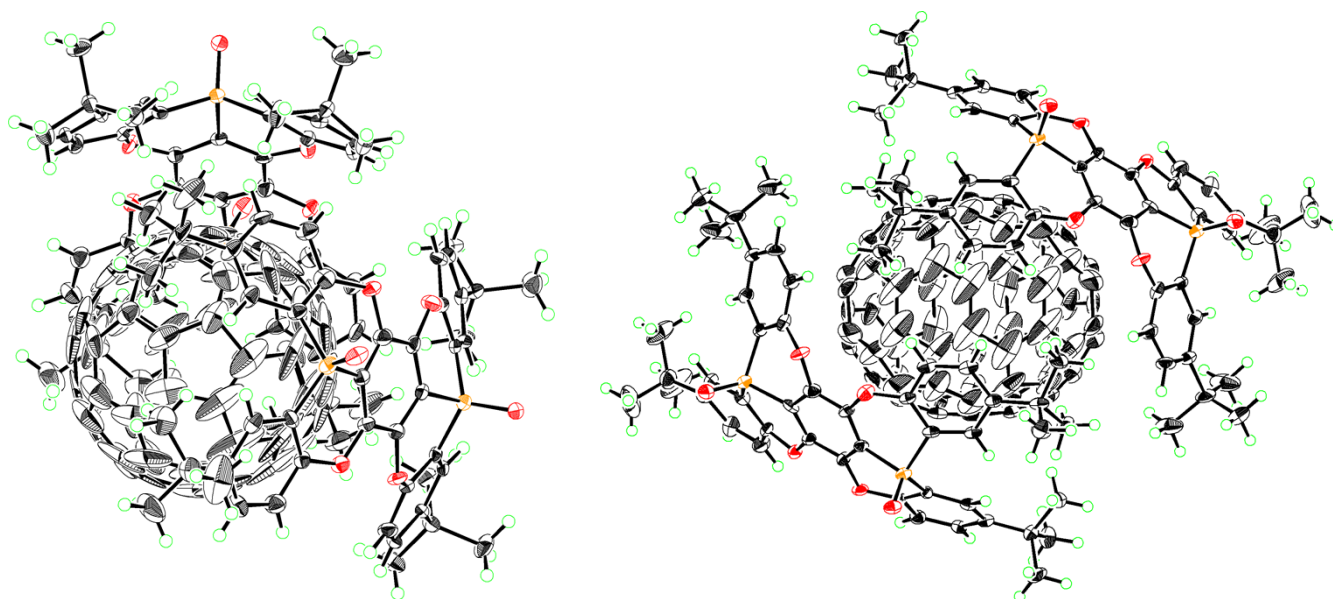

**Figure S33.** ORTEP drawing of  $(\text{P2})_2\text{C}_{70}$  (**V**), top (left) and side (right) views; thermal ellipsoids set at 50% probability. Solvent molecules are omitted for clarity.

## (8) References

- [S1] T. Senda, M. Ogasawara, T. Hayashi, *J. Org. Chem.* 2001, **66**, 6852-6856.
- [S2] (a) G. M. Sheldrick, *Acta Crystallogr. Sect. A* 2008, **64**, 112-122. (b) G. M. Sheldrick, *SHELX-2014/6, Program for crystal structure determination*; Universität Göttingen: Göttingen, Germany, 2014.
